# Supplementary material for: Engineering of imidazo[1,2- a ]pyridine into multifunctional dual-state emissive (DSE) luminogens for hydrazine sensing and cell-imaging
Source: Royal Society of Chemistry journal article supplement (doi:10.1039/d4tc04343j), 2025-01-01
Supplement: d4tc04343j1.pdf [file d4tc04343j1.pdf]

## Engineering of Imidazo[1,2-a]pyridine into Multifunctional Dual-State Emissive (DSE) Luminogens for Hydrazine Sensing and Cell-imaging

Gauravi Yashwantrao,<sup>a</sup> Prajakta Gosavi,<sup>a</sup> Vaishnavi Naik,<sup>b</sup> Monalisha Debnath,<sup>c</sup> Saona Seth,<sup>d</sup> Purav Badani,<sup>b</sup> Rohit Srivastava,<sup>c</sup> and Satyajit Saha<sup>a\*</sup>

<sup>a</sup>Department of Speciality Chemicals Technology, Institute of Chemical Technology (ICT), Mumbai, Maharashtra-400019, India

<sup>b</sup>Department of Chemistry, University of Mumbai, Kalina Campus, Mumbai, Maharashtra, India

<sup>c</sup>Department of Biosciences and Bioengineering, Indian Institute of Technology Bombay, Mumbai, Maharashtra, India

<sup>d</sup>Department of Applied Sciences, Tezpur University, Assam, India

Corresponding author e-mail: [ss.saha@ictmumbai.edu.in](mailto:ss.saha@ictmumbai.edu.in)

### Table of Contents

|                                                                                                                                                            |         |
|------------------------------------------------------------------------------------------------------------------------------------------------------------|---------|
| General aspects.....                                                                                                                                       | S2      |
| Photophysical Properties of <b>GBY-12</b> , <b>GBY-13</b> , <b>GBY-14</b> and <b>GBY-15</b> .....                                                          | S2      |
| Solvatochromism of <b>GBY-12</b> , <b>GBY-13</b> , <b>GBY-14</b> and <b>GBY-15</b> .....                                                                   | S2-S5   |
| Aggregation Induced Emission Studies of <b>GBY-12</b> , <b>GBY-13</b> , <b>GBY-14</b> , <b>GBY-15</b> ...                                                  | S6      |
| Tyndall Effect and DLS analysis <b>GBY-12</b> , <b>GBY-13</b> , <b>GBY-14</b> and <b>GBY-15</b> .....                                                      | S7-S8   |
| SEM Analysis <b>GBY-12</b> , <b>GBY-13</b> , <b>GBY-14</b> and <b>GBY-15</b> .....                                                                         | S8      |
| Detection of trace Water by <b>GBY-13</b> .....                                                                                                            | S9      |
| TGA-DSC profiles of the luminogens <b>GBY-12</b> , <b>GBY-13</b> , <b>GBY-14</b> , and <b>GBY-15</b>                                                       | S9      |
| Cyclic Voltammetry Analysis of <b>GBY-12</b> , <b>GBY-13</b> , <b>GBY-14</b> and <b>GBY-15</b> .....                                                       | S9-S11  |
| DFT Calculations.....                                                                                                                                      | S12-S26 |
| Cell-imaging Details of <b>GBY-12</b> , <b>GBY-13</b> , <b>GBY-14</b> and <b>GBY-15</b> .....                                                              | S27-S29 |
| Hydrazine Sensing of <b>GBY-15</b> .....                                                                                                                   | S30-S31 |
| References.....                                                                                                                                            | S32     |
| <sup>1</sup> H and <sup>13</sup> C NMR Spectral Reproductions Of <b>3</b> , <b>5</b> , <b>GBY-12</b> , <b>GBY-13</b> , <b>GBY-14</b> , <b>GBY-15</b> ..... | S33-S38 |
| LC-HRMS data of <b>3</b> , <b>5</b> , <b>GBY-12</b> , <b>GBY-13</b> , <b>GBY-14</b> , <b>GBY-15</b> .....                                                  | S39-S41 |
| Single Crystal X-Ray Data of <b>GBY-12</b> , and <b>GBY-14</b> .....                                                                                       | S42-S59 |

## General aspects

All chemicals were purchased from available commercial sources like Sigma-Aldrich, Spectrochem, and S. D. Fine chemicals and used without further purification. Organic solvents were dried and distilled before use. Silica gel-coated aluminium sheets (ACME, 254F) were used for the Thin Layer Chromatography (TLC) analysis using EtOAc and petroleum ether as the eluents to monitor the reaction progress. Melting points of all the compounds were recorded by the AnalabThermoCal melting point apparatus in the open capillary tube. Fourier transform infrared (FTIR) (ATR-IR) spectra were obtained with Alpha-II/Bruker-instrument. The  $^1\text{H}$  Nuclear Magnetic Resonance ( $^1\text{H}$  NMR) spectroscopy was carried out on Bruker 400 spectrometer whereas  $^{13}\text{C}$  NMR was carried out on 100 MHz spectrometer using  $\text{CDCl}_3$  as a solvent. Chemical shifts are reported in parts per million (ppm) downfield from TMS, and the spin multiplicities are described as s (singlet), d (doublet), t (triplet), and multiplet (m). Coupling constant (J) values are reported in hertz (Hz). Thermogravimetric analysis (TGA) was conducted on a Perkin-Elmer Diamond TG/DTA instrument at a heating rate of  $10\text{ }^\circ\text{C}/\text{min}$  under a nitrogen atmosphere with a flow rate of  $150\text{ mL}/\text{min}$ . UV-Visible absorption spectra were obtained on a FP-8200/Jasco spectrophotometer. Cyclic voltammetry (CV) measurements were measured in an electrolyte solution of tetrabutylammonium hexafluorophosphate ( $\text{Bu}_4\text{NPF}_6$ ) in DMF (0.1 M), using platinum gauze and Ag/AgCl as the counter and reference electrodes respectively. A scan rate of  $25\text{ mV}/\text{s}$  was used during the CV measurements.

## Photophysical Properties of GBY-12, GBY-13, GBY-14 and GBY-15

### Preparation of stock solution luminogens in THF solvent

Here, for **GBY-12**

Molecular weight = 553.22 g

Therefore, 553.22 g in 1000 mL of THF  $\equiv$  1M

$$\text{Concentration (M)} = \frac{\text{Mass (g)}}{\text{Formula weight (g)} * \text{Volume (L)}}$$

Hence, to prepare 1mM stock solution 5.53 mg of **GBY-12** was dissolved in 10ml THF Similarly, stock solution for **GBY-13, GBY-14 and GBY-15** and **L3** was prepared.

### Solvatochromic property:

For UV-Visible absorption studies, the UV-visible absorption measurement was performed in a JASCO V-750 spectrophotometer under room temperature using two side opaque and two side transparent quartz cuvettes having path length equalled to 1 cm. For solution state measurement, concentration of the luminogens **GBY-12, GBY-13, GBY-14 and GBY-15** stock was kept at 1 mM. For photoluminescence studies, the emission measurement was performed in a JASCO FP-8200 spectrofluorimeter under room temperature using all side transparent quartz cuvette with path length equal to 1cm. Likewise absorption studies, concentration of the luminogen was kept at 1 mM throughout the solution state measurement.

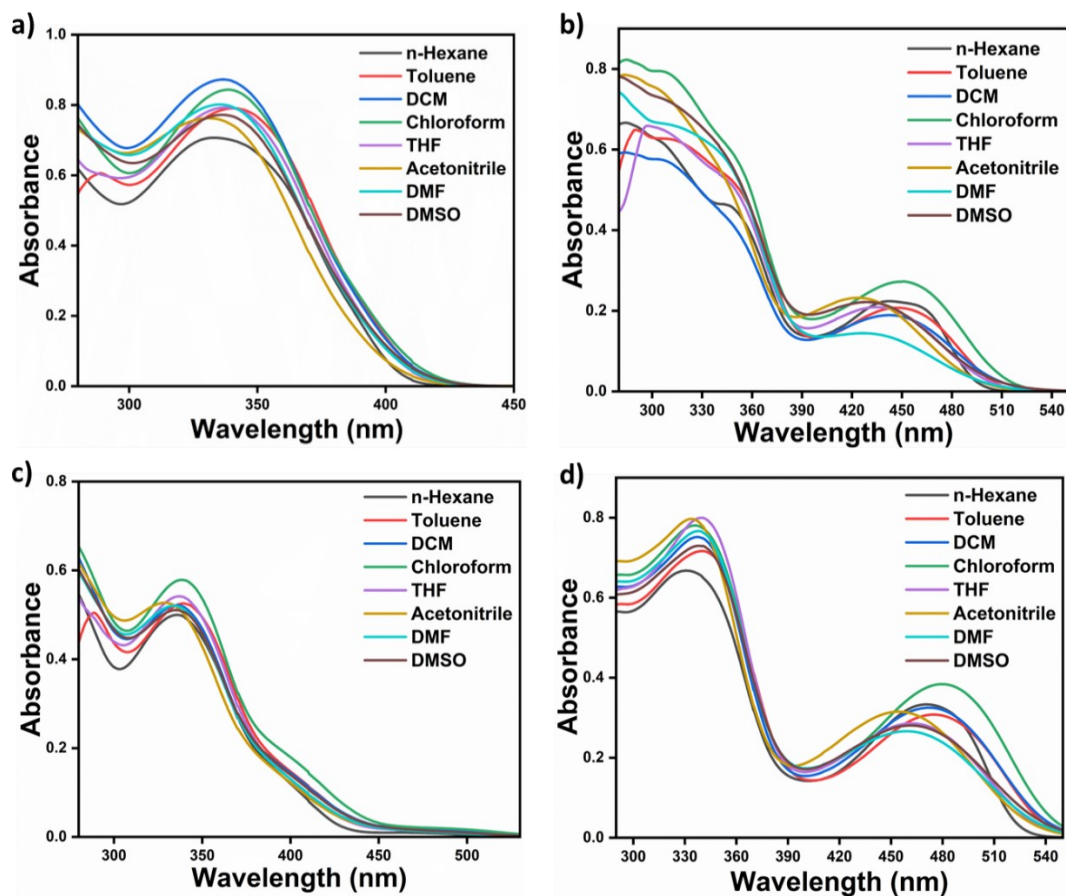

**Figure S1.** Solvatochromic properties of GBY-12, GBY-13, GBY-14 and GBY-15.

**Table S1.** Stoke's shift for calculation for GBY-12

| GBY-12       |                 |                 |              |               |
|--------------|-----------------|-----------------|--------------|---------------|
| Solvent      | $\lambda_{abs}$ | $\lambda_{emi}$ | Stokes shift |               |
|              |                 |                 | (nm)         | ( $cm^{-1}$ ) |
| n-Hexane     | 333             | 500.5           | 167.5        | 10050.01      |
| Toluene      | 341             | 461             | 120          | 7633.539      |
| DCM          | 336.5           | 491.5           | 155          | 9371.802      |
| Chloroform   | 338.5           | 495.5           | 157          | 9360.463      |
| THF          | 337.5           | 481.5           | 144          | 8861.198      |
| Acetonitrile | 331             | 503             | 172          | 10330.76      |
| DMF          | 335.5           | 493.5           | 158          | 9542.835      |
| DMSO         | 336.5           | 504.5           | 168          | 9896.076      |

**Table S2.** Stoke's shift calculation for **GBY-13**

| <b>GBY-13</b>  |                      |                      |              |                      |
|----------------|----------------------|----------------------|--------------|----------------------|
| <b>Solvent</b> | $\lambda_{abs}$ (nm) | $\lambda_{emi}$ (nm) | Stokes shift |                      |
|                |                      |                      | (nm)         | ( $\text{cm}^{-1}$ ) |
| n-Hexane       | 442.5                | 506                  | 63.5         | -63.5                |
| Toluene        | 447                  | 543.5                | 96.5         | -96.5                |
| DCM            | 442.5                | 566                  | 123.5        | -123.5               |
| Chloroform     | 450.5                | 561                  | 110.5        | -110.5               |
| THF            | 435                  | 563.5                | 128.5        | -128.5               |
| Acetonitrile   | 423.5                | 562                  | 138.5        | -138.5               |
| DMF            | 390                  | 567                  | 177          | -177                 |
| DMSO           | 429                  | 570                  | 141          | -141                 |

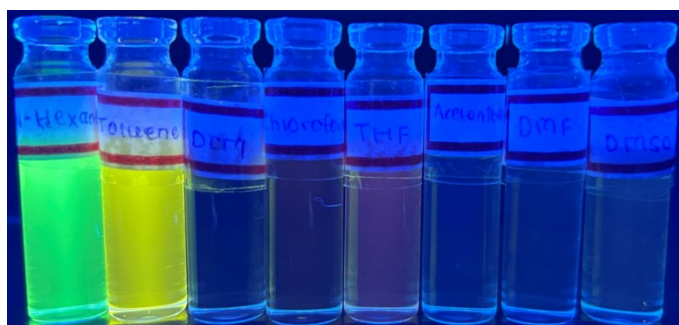**Figure S2.** Effect of different solvent polarity on **GBY-13** visualized under UV light (365 nm).**Table S3.** Stoke's shift calculation for **GBY-14**

| <b>GBY-14</b>  |                 |                 |              |                      |
|----------------|-----------------|-----------------|--------------|----------------------|
| <b>Solvent</b> | $\lambda_{abs}$ | $\lambda_{emi}$ | Stokes shift |                      |
|                |                 |                 | (nm)         | ( $\text{cm}^{-1}$ ) |
| n-Hexane       | 336             | 465             | 129          | 8256.528             |
| Toluene        | 339.5           | 477.5           | 138          | 8512.673             |
| DCM            | 337             | 482             | 145          | 8926.703             |
| Chloroform     | 335.5           | 493             | 157.5        | 9522.284             |
| THF            | 338.5           | 494             | 155.5        | 9299.183             |
| Acetonitrile   | 329             | 498             | 169          | 10314.82             |
| DMF            | 334             | 496             | 162          | 9778.829             |
| DMSO           | 335             | 502             | 167          | 9930.428             |

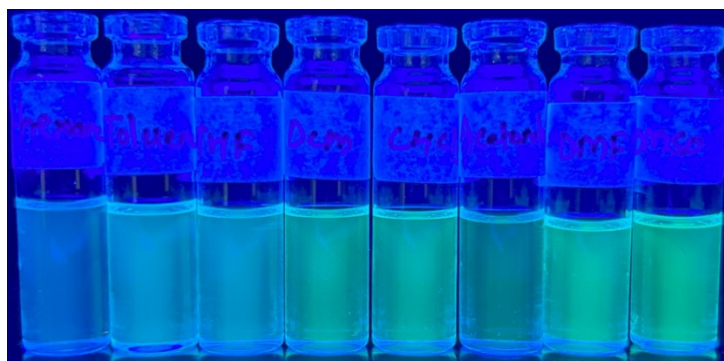

**Figure S3.** Effect of different solvent polarity on **GBY-14** visualized under UV light (365 nm).

**Table S4.** Stoke's shift calculation for **GBY-15**

| GBY-15       |                      |                      |              |               |
|--------------|----------------------|----------------------|--------------|---------------|
| Solvent      | $\lambda_{abs}$ (nm) | $\lambda_{emi}$ (nm) | Stokes shift |               |
|              |                      |                      | (nm)         | ( $cm^{-1}$ ) |
| n-Hexane     | 331                  | 527.5                | 196.5        | 11254.13      |
|              | 470.5                |                      | 57           | 2296.639      |
| Toluene      | 340                  | 554.5                | 214.5        | 11377.5       |
|              | 475                  |                      | 79.5         | 3018.366      |
| DCM          | 337                  | 565                  | 228          | 11974.48      |
|              | 472                  |                      | 93           | 3487.326      |
| Chloroform   | 336                  | 564.5                | 228.5        | 12047.11      |
|              | 479.5                |                      | 85           | 3140.266      |
| THF          | 340.5                | 566                  | 225.5        | 11700.73      |
|              | 462                  |                      | 104          | 3977.177      |
| Acetonitrile | 334                  | 572.5                | 238.5        | 12472.87      |
|              | 454.5                |                      | 118          | 4534.951      |
| DMF          | 338                  | 577                  | 239          | 12254.78      |
|              | 459                  |                      | 118          | 4455.47       |
| DMSO         | 338                  | 583.5                | 245.5        | 12447.84      |
|              | 461.5                |                      | 122          | 4530.512      |

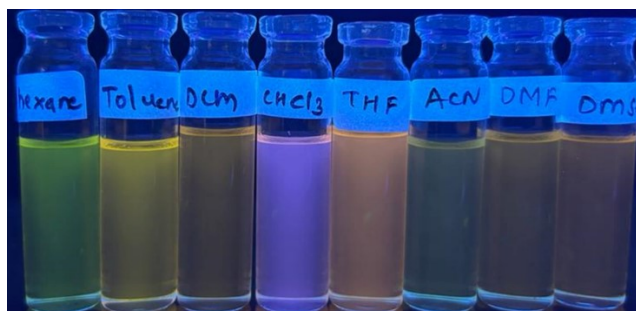

**Figure S4.** Effect of different solvent polarity on **GBY-15** visualized under UV light (365 nm).

## Aggregation induced emission

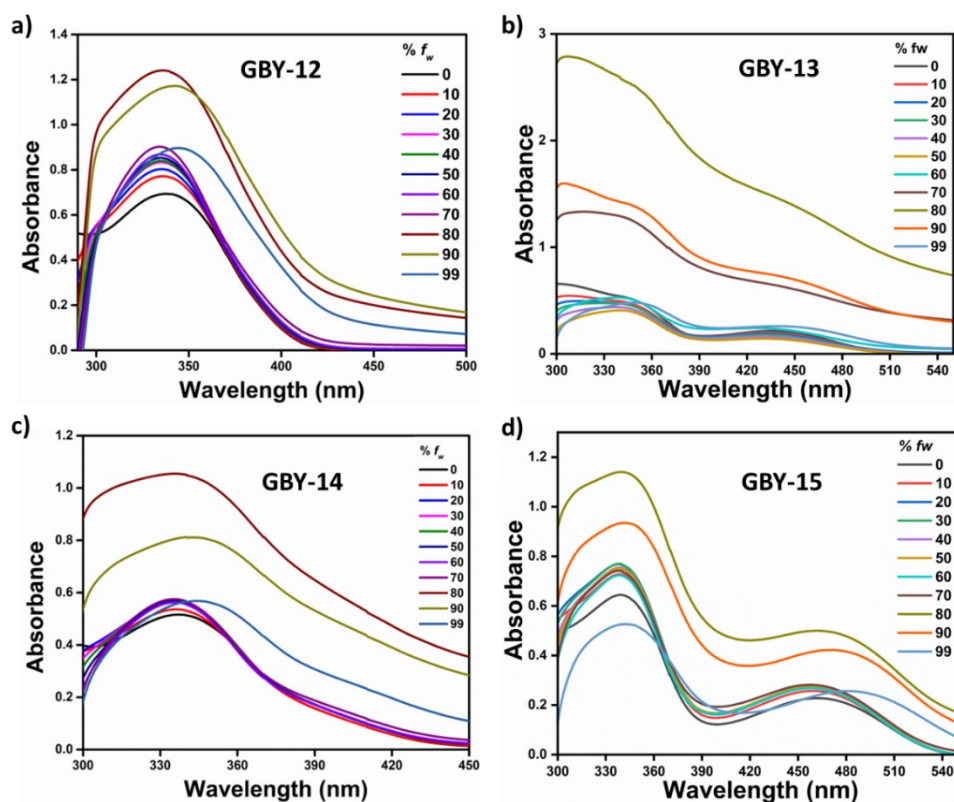

**Figure S5.** Absorption spectra of GBY-12, GBY-13, GBY-14 and GBY-15 with incremental rise in H<sub>2</sub>O fraction.

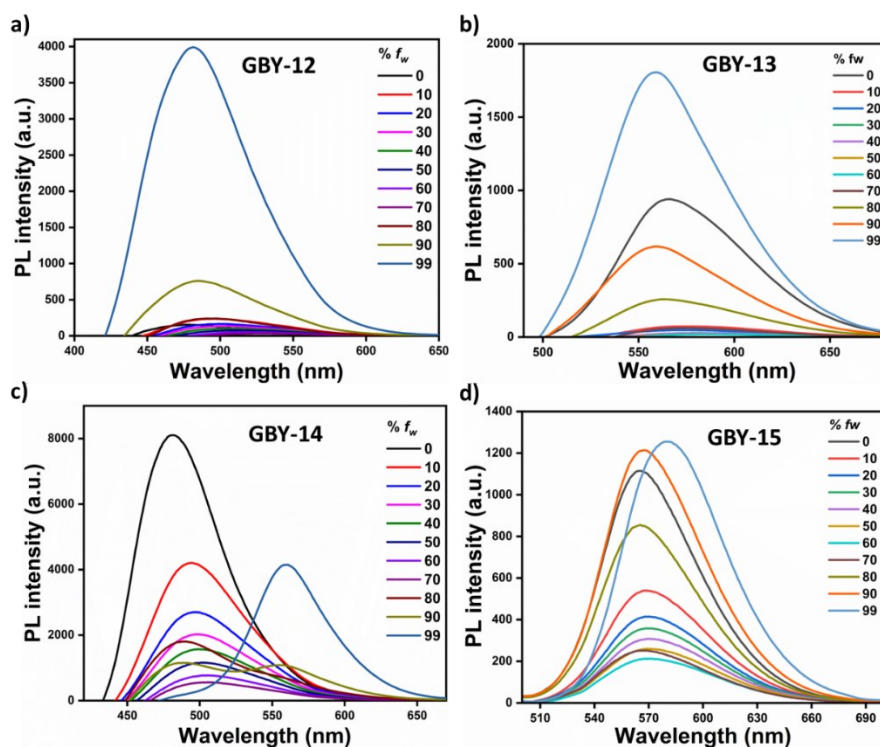

**Figure S6.** Emission spectra of GBY-12, GBY-13, GBY-14 and GBY-15 with incremental rise in H<sub>2</sub>O fraction at excitation wavelength 337.5 nm, 435 nm, 337 nm, and 462 nm respectively.



**Tyndall Effect:** The enhancement in emission intensity was attributed to the formation of aggregates, which was further validated by the Tyndall effect and DLS experiments. When a beam of light passes through a colloid, the colloidal particles present in the solution do not allow the beam to completely pass through. The light collides with the colloidal particles and is scattered (it deviates from its normal trajectory, which is a straight line). This scattering makes the path of the light beam visible. Tyndall effect [1] was observed when laser light was passed through the aggregated states (99% water) of luminogens.

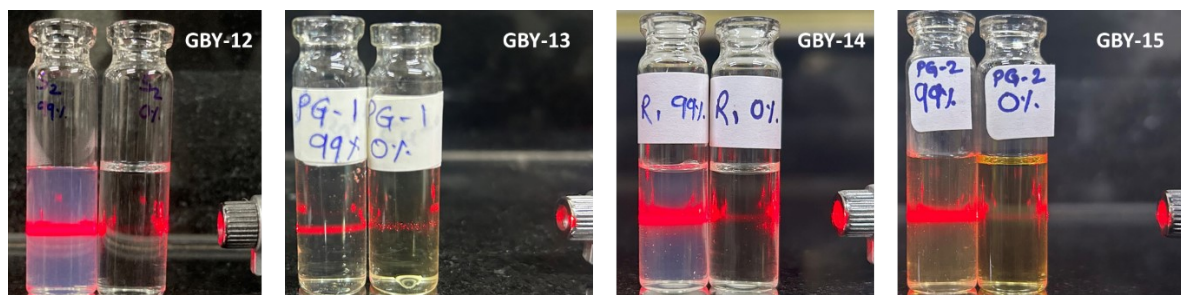

**Figure S7.** Observance of Tyndall effect on the aggregated states of **GBY-12, GBY-13, GBY-14, GBY-15.**

**Dynamic light scattering (DLS) experiments:** The size distribution of the evolved aggregates in THF at higher water fraction was determined through DLS experiment, using Malvern Zetasizer Nano-ZS90 instrument. A transparent disposable polystyrene cuvette with a path length equalled to 1 cm, containing the desired solution was utilized in the experiment. A 632.8 nm red laser was employed as an excitation source at a fixed scattering angle (90° optics)

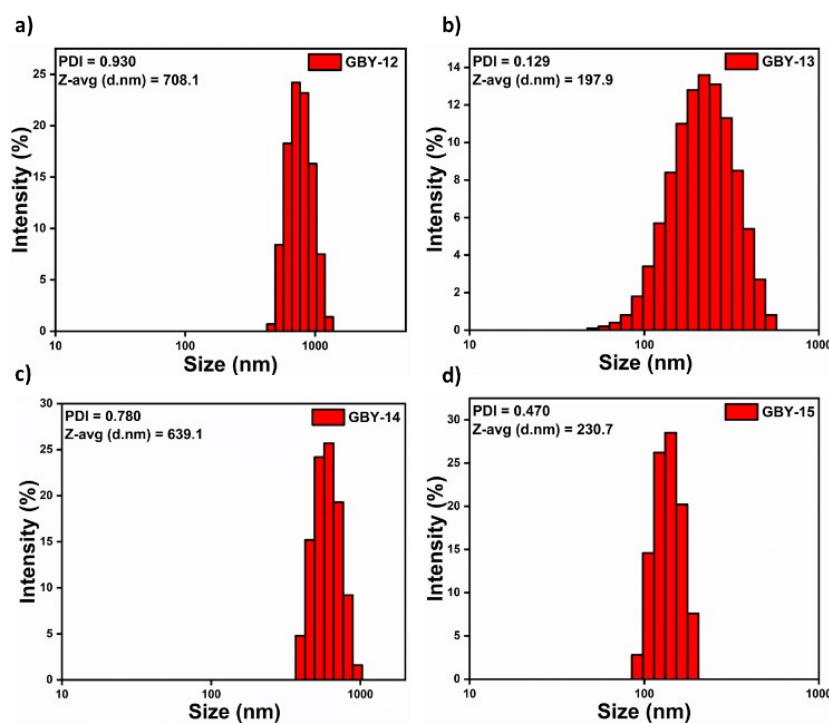

**Figure S8.** Particle size distribution profiles of the aggregated forms of **GBY-12, GBY-13, GBY-14, GBY-15** at fw 99%

**Table S5.** DLS parameter of luminogens **GBY-12**, **GBY-13**, **GBY-14** and **GBY-15** in THF at water fraction (99%).

| Luminogens    | Z-Average (nm) | PDI   | Peak 1 (Size in nm) | Peak 1 (St.Dev in nm) |
|---------------|----------------|-------|---------------------|-----------------------|
| <b>GBY-12</b> | 708.1          | 0.930 | 277.3               | 34.19                 |
| <b>GBY-13</b> | 197.9          | 0.129 | 231.2               | 92.06                 |
| <b>GBY-14</b> | 639.1          | 0.780 | 272.2               | 45.47                 |
| <b>GBY-15</b> | 230.7          | 0.470 | 136.9               | 32.84                 |

**Scanning Electron Microscopy:** Scanning electron microscope (SEM) images of luminogens **GBY-12**, **GBY-13**, **GBY-14** and **GBY-15** aggregates, were recorded using SEM Quanta 200 – EDX system. Before recording the images, sonicate the sample and was placed using glass capillary on the aluminium stub. Mount sample over carbon tape whose half portion was covered with aluminium foil on aluminium stub.

**Preparation of Nanoaggregates:** Nanoaggregates of luminogens **GBY-12**, **GBY-13**, **GBY-14** and **GBY-15** were prepared by adding 50  $\mu\text{L}$  of stock solution (0.1 mM) in a solution containing 4.95 mL of water and 0.05 mL of THF with vigorous shaking.

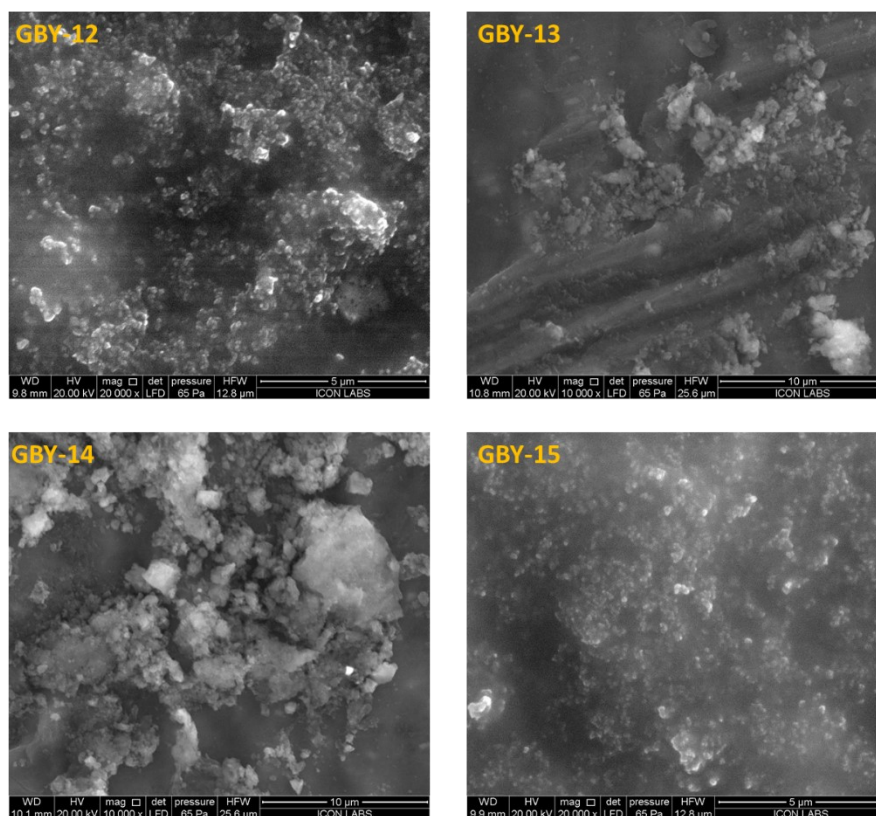

**Figure S9.** SEM images of the aggregate states **GBY-12**, **GBY-13**, **GBY-14** and **GBY-15**.



## Detection of Trace Water

Limit of detection

Detection limit calculations for **GBY-13** (1 mM) in THF

$\sigma$  = Standard Deviation obtained from 10 blank emission measurement of THF:Water (100:0.0 v/v)

$$\sigma = 3.2213$$

and  $k$  is slope obtained from Plot of emission intensity of **GBY-13** in THF:Water (100:0.0 v/v) at 435 nm versus water fraction (%)

$$k = 336.6708$$

$$\text{Detection limit} = 3\sigma/k$$

$$\text{Detection limit} = 3 * 3.2213 / 336.6708$$

$$\text{Detection limit} = 0.028 \text{ vol\% (280 ppm)}$$

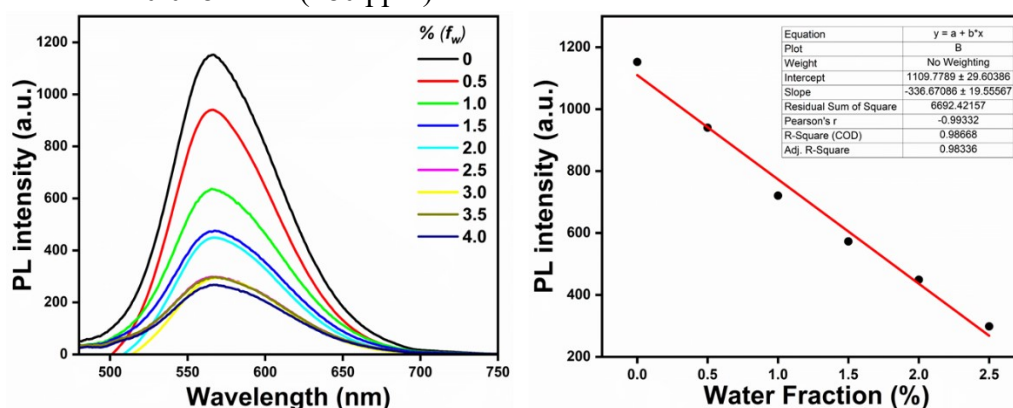

**Figure S10.** Moisture Sensing with **GBY-13** and Plot of water fraction (%) vs PL intensity.

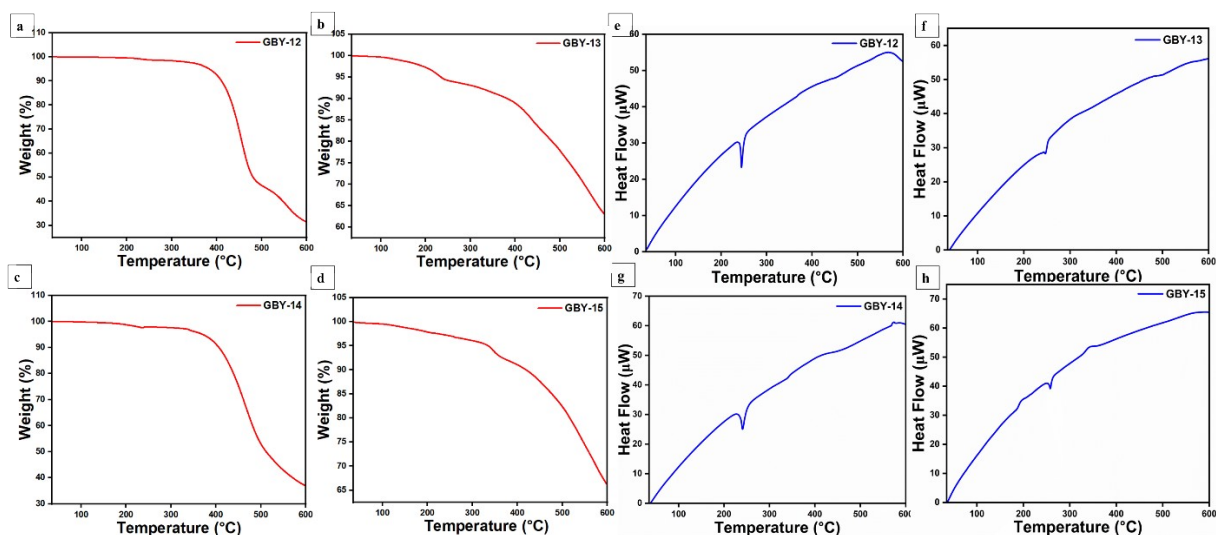

**Figure S11.** TGA-DSC profiles of the luminogens **GBY-12**, **GBY-13**, **GBY-14**, and **GBY-15**.

## Cyclic Voltammetry Analysis of **GBY-12**, **GBY-13**, **GBY-14** and **GBY-15**:

The electrochemical study was carried out by cyclic voltammetry. Cyclic voltammetry measurements were recorded in an electrolyte solution of 0.1 M tetrabutylammonium hexafluorophosphate ( $t\text{Bu}_4\text{NPF}_6$ ) in DMF using Ag/AgCl as reference electrode and platinum

gauze as the counter electrode. Glassy carbon electrode was used as a working electrode and the analysis was carried out at a scan rate of 25 mV/s. The concentration of all three analyte (Luminogens) used was 1 mM. To perform the experiment, the three-electrode system was subjected to a solution containing both analyte and electrolyte in 1:1 proportion.

HOMO and LUMO energies and HOMO-LUMO energy gap (EHL) of Luminogens **GBY-12**, **GBY-13**, **GBY-14** and **GBY-15** calculated from experimental data as follows,

For **GBY-12**

Onset absorption wavelength ( $\lambda_{\max}$ ) DMF: 338 nm

Onset CV oxidation: 1.12 V

$$\begin{aligned} E_{\text{HOMO}} &= - (4.8 + E_{\text{OX onset}}) \text{ eV} \\ &= - (4.8 + 1.12) \text{ eV} \\ &= - 5.92 \text{ eV} \end{aligned}$$

$$\begin{aligned} E_{\text{band gap}} &= 1240/\lambda_{\max} \\ &= 1240/ 338 \\ &= 3.66 \text{ eV} \end{aligned}$$

$$\begin{aligned} E_{\text{LUMO}} &= E_{\text{HOMO}} + E_{\text{band gap}} \\ &= -5.92 + 3.66 \\ &= -2.26 \end{aligned}$$

For **GBY-13**

Onset absorption wavelength ( $\lambda_{\max}$ ) DMF: 432 nm

Onset CV oxidation: 1.42 V

$$\begin{aligned} E_{\text{HOMO}} &= - (4.8 + E_{\text{OX onset}}) \text{ eV} \\ &= - (4.8 + 1.42) \text{ eV} \\ &= - 6.22 \text{ eV} \end{aligned}$$

$$\begin{aligned} E_{\text{band gap}} &= 1240/\lambda_{\max} \\ &= 1240/ 432 \\ &= 2.87 \text{ eV} \end{aligned}$$

$$\begin{aligned} E_{\text{LUMO}} &= E_{\text{HOMO}} + E_{\text{band gap}} \\ &= -6.22 + 2.87 \\ &= -3.35 \text{ eV} \end{aligned}$$

For **GBY-14**

Onset absorption wavelength ( $\lambda_{\max}$ ) DMF: 334.5 nm

Onset CV oxidation: 1.13 V

$$\begin{aligned} E_{\text{HOMO}} &= - (4.8 + E_{\text{OX onset}}) \text{ eV} \\ &= - (4.8 + 1.13) \text{ eV} \\ &= - 5.93 \text{ eV} \end{aligned}$$

$$\begin{aligned} E_{\text{band gap}} &= 1240/\lambda_{\max} \\ &= 1240/ 334.5 \\ &= 3.70 \text{ eV} \end{aligned}$$

$$\begin{aligned} E_{\text{LUMO}} &= E_{\text{HOMO}} + E_{\text{band gap}} \\ &= -5.93 + 3.70 \end{aligned}$$

$$= -2.23 \text{ eV}$$

For **GBY-15**

Onset absorption wavelength ( $\lambda_{\text{max}}$ ) DMF: 460, 337 nm

Onset CV oxidation: 1.36 V

$$\begin{aligned} E_{\text{HOMO}} &= -(4.8 + E_{\text{OX onset}}) \text{ eV} \\ &= -(4.8 + 1.36) \text{ eV} \\ &= -6.16 \text{ eV} \end{aligned}$$

$$\begin{aligned} E_{\text{band gap}} &= 1240/\lambda_{\text{max}} \\ &= 1240/460 \\ &= 2.69 \text{ eV} \end{aligned}$$

$$\begin{aligned} E_{\text{LUMO}} &= E_{\text{HOMO}} + E_{\text{band gap}} \\ &= -6.16 + 2.69 \\ &= -3.47 \text{ eV} \end{aligned}$$

**Table S6.** Electrochemical Data of **GBY-12**, **GBY-13**, **GBY-14** and **GBY-15** in DMF.

| Luminogens    | E (Onset/ox) [V] | $\lambda_{\text{onset}}$ (nm) | HOMO [eV] | LUMO [eV] | Band gap [eV] |
|---------------|------------------|-------------------------------|-----------|-----------|---------------|
| <b>GBY-12</b> | 1.12             | 338                           | -5.92     | -2.26     | 3.66          |
| <b>GBY-13</b> | 1.42             | 432                           | -6.22     | -3.35     | 2.87          |
| <b>GBY-14</b> | 1.13             | 334.5                         | -5.93     | -2.23     | 3.70          |
| <b>GBY-15</b> | 1.36             | 460                           | -6.16     | -3.47     | 2.69          |

$$E_{\text{HOMO}} = -(4.8 + E_{\text{ox onset}}) \text{ eV}$$

$$E_{\text{LUMO}} = E_{\text{HOMO}} + E_{\text{band gap}}$$

$$\text{Band gap} = (E_{\text{LUMO}} - E_{\text{HOMO}}) \text{ eV or } 1240/\lambda_{\text{max onset}}$$

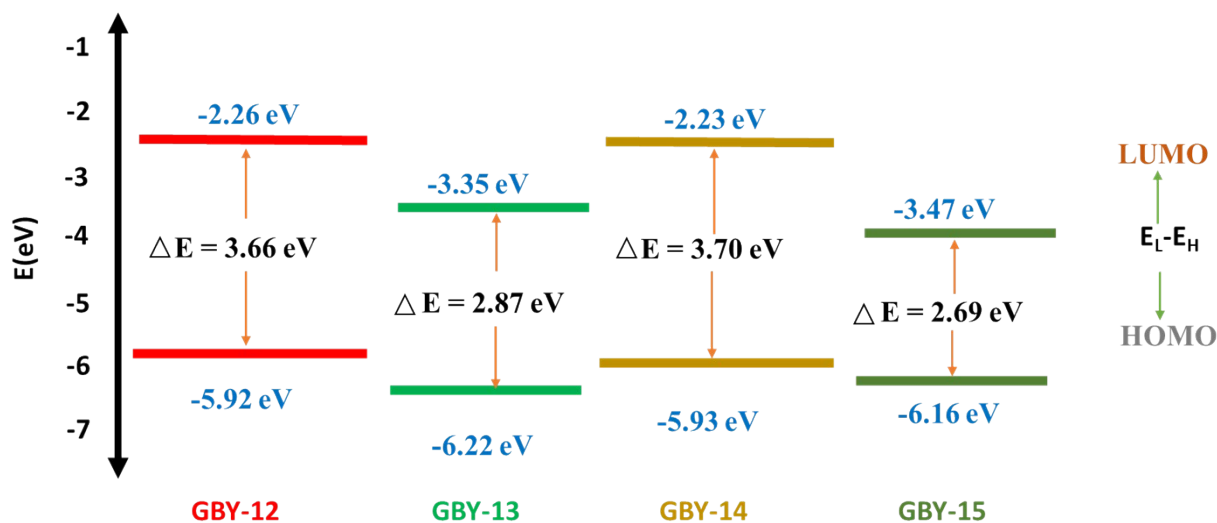

**Figure S12.** The experimentally calculated HOMO-LUMO energy gap of Luminogens **GBY-12**, **GBY-13**, **GBY-14** and **GBY-15** from cyclic voltammetry analysis

## DFT Calculations

To evaluate the theoretical bandgap of the luminogens **GBY-12**, **GBY-13**, **GBY-14** and **GBY-15** density functional theory (DFT) calculations were performed at DFT/ B3LYP level of theory using the Gaussian 09 suite of program. Energy minimization of structures was carried out at a 6-311+G(d,p) basis.<sup>[2]</sup>

The DFT calculation results disclosed that for all the three luminogens **GBY-12**, **GBY-13**, **GBY-14** and **GBY-15**, the electron distribution of the HOMO is localised on entire moiety. However, in LUMO for **GBY-12**, **GBY-13**, **GBY-14** and **GBY-15**, the electrons have localized on heterocyclic moiety that is imidazopyridine core and electron withdrawing moieties.

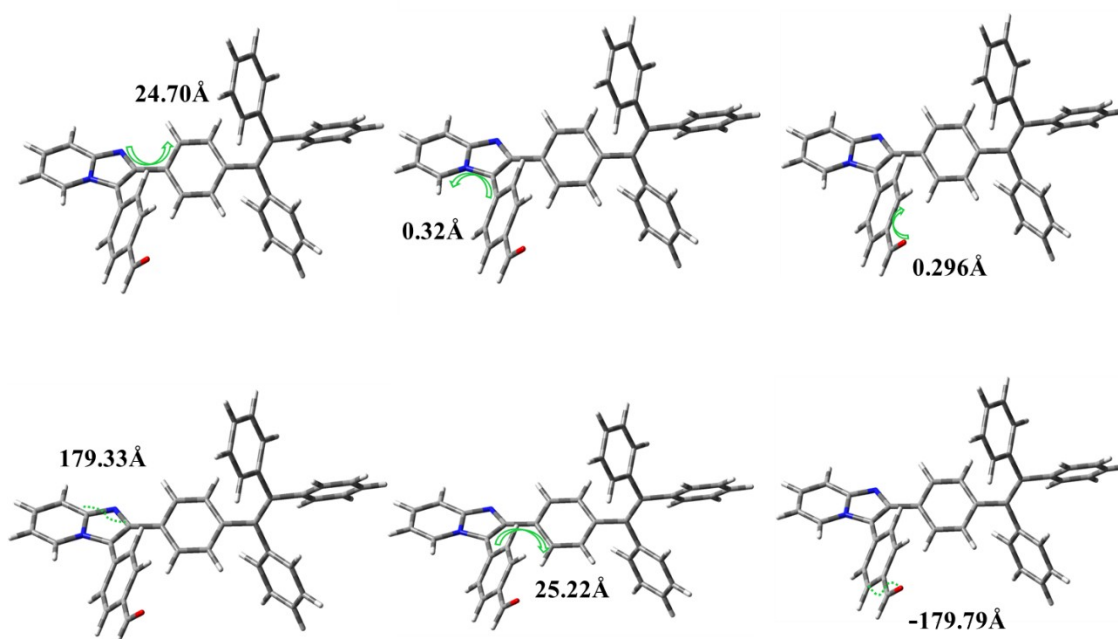

**Figure S13.** Dihedral angle existing in **GBY-12**

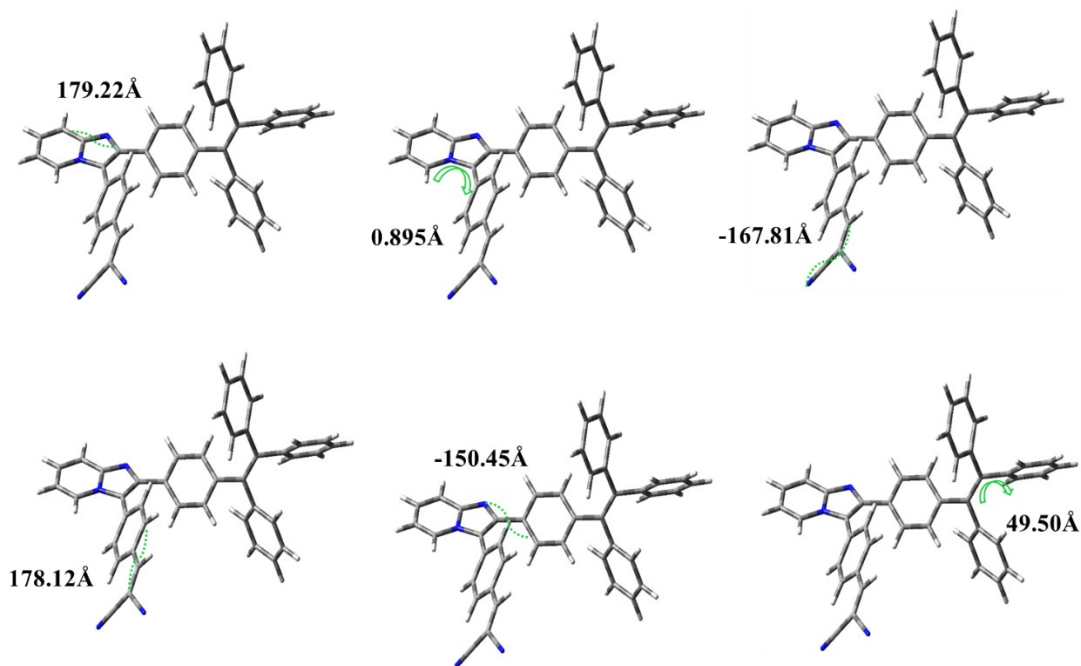

**Figure S14.** Dihedral angle existing in GBY-13.

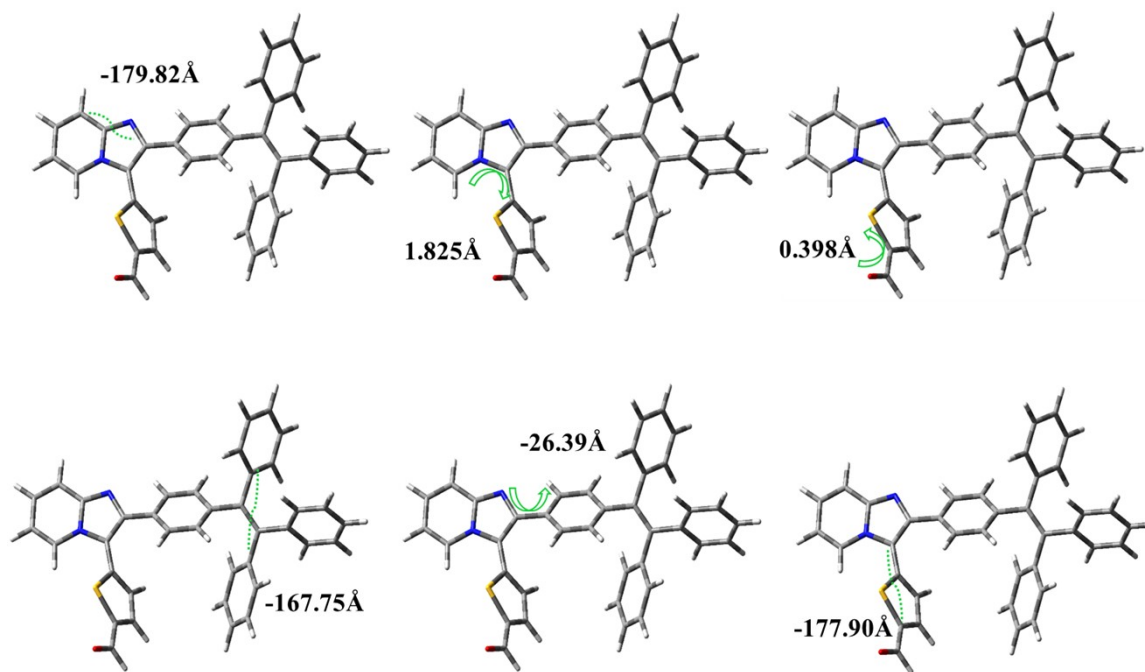

**Figure S15.** Dihedral angle existing in GBY-14.



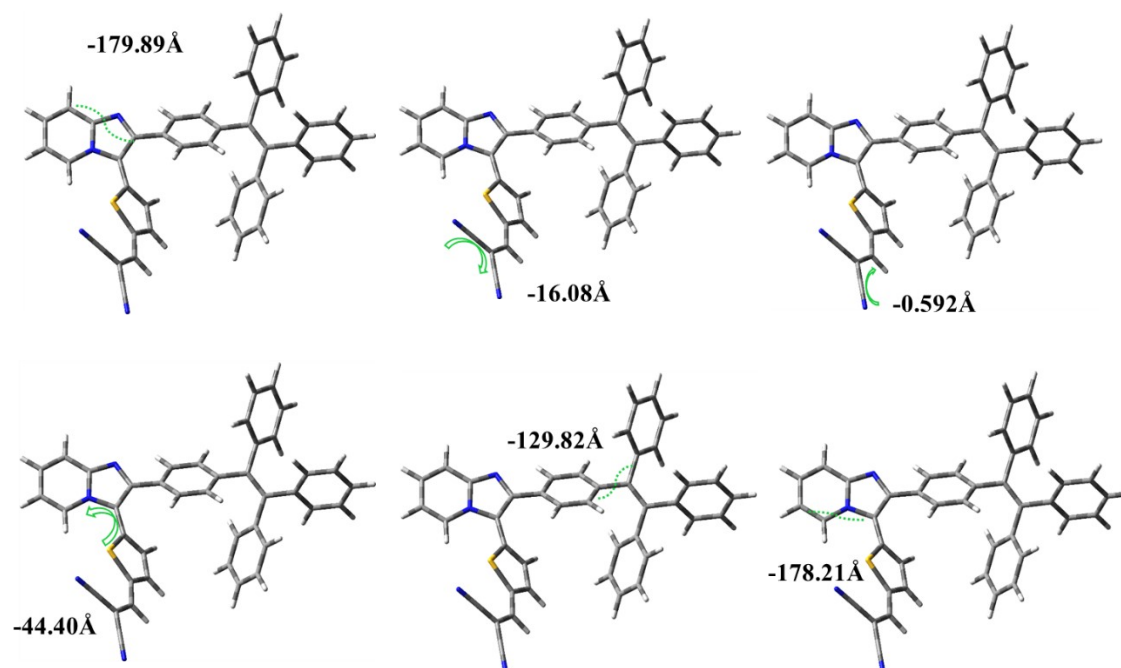

**Figure S16.** Dihedral angle existing in **GBY-15**.

In our current study, we focused on the geometry optimization of a given structures using the Gaussian 09 program. To achieve this, we employed the Density Functional Theory (DFT) approach, specifically utilizing the B3LYP functional and the 6-311G basis set. Furthermore, in order to refine the energy, we performed single-point energy calculations at the B3LYP/6-311++G (df,pd) level of theory. In addition to optimizing the structures and refining the energy calculations, we also investigated the impact of the solvent on the structures. To achieve this, we conducted single-point electronic structure calculations using an implicit CPCM model at the B3LYP/6-311++G (df,pd) level of theory. Specifically, we considered the *n,n*-Dimethylformamide (DMF) solvent environment. The Cartesian coordinates for the optimized structures are provided.

### Cartesian Coordinates

#### GBY-12

Total energy: -1725.78546537 a.u.

Charge: 0

Spin: Singlet

Dipole moment: 4.0399 Debye

Function/Basis set: B3LYP/6-311G

C            -7.46038200    1.74524600    -1.31500300

|   |             |             |             |
|---|-------------|-------------|-------------|
| C | -7.58579800 | 0.40541600  | -0.84305500 |
| C | -6.47860800 | -0.32686000 | -0.51469100 |
| N | -5.22661000 | 0.24302600  | -0.65283800 |
| C | -5.06833300 | 1.58307400  | -1.09045300 |
| C | -6.21953800 | 2.32547900  | -1.43082700 |
| C | -3.94392500 | -0.24722200 | -0.36221400 |
| C | -3.07097800 | 0.81261500  | -0.65276500 |
| N | -3.77345000 | 1.92234600  | -1.09143200 |
| C | -1.60524900 | 0.86993300  | -0.58250600 |
| C | -0.97785000 | 2.12159800  | -0.44244700 |
| C | 0.40746700  | 2.22283600  | -0.37508000 |
| C | 1.22686800  | 1.08186900  | -0.45764200 |
| C | 0.59767400  | -0.16330700 | -0.64000900 |
| C | -0.78951100 | -0.27053500 | -0.69332100 |
| C | 2.71769900  | 1.18383500  | -0.41810900 |
| C | 3.38374500  | 1.90556900  | 0.53286800  |
| C | 4.84381300  | 2.21951400  | 0.43450100  |
| C | 2.70942500  | 2.44004800  | 1.75772700  |
| C | 3.42598000  | 0.43090500  | -1.50146100 |
| C | 2.89820500  | 3.77786800  | 2.15177400  |
| C | 2.28699500  | 4.27956500  | 3.30158400  |
| C | 1.49055000  | 3.44826800  | 4.09449100  |
| C | 1.31245000  | 2.11150300  | 3.72775600  |
| C | 1.91444600  | 1.61307400  | 2.57165100  |
| C | 5.69227000  | 2.02208900  | 1.54013600  |

|   |             |             |             |
|---|-------------|-------------|-------------|
| C | 7.05153700  | 2.32846200  | 1.46456900  |
| C | 7.58877200  | 2.85840200  | 0.28785300  |
| C | 6.75425100  | 3.07966900  | -0.81117900 |
| C | 5.39714100  | 2.76308700  | -0.73892100 |
| C | 3.01799700  | 0.55605800  | -2.84253100 |
| C | 3.66066600  | -0.15568100 | -3.85635100 |
| C | 4.71245200  | -1.02354800 | -3.54844500 |
| C | 5.11443300  | -1.17372600 | -2.21844700 |
| C | 4.47864900  | -0.45360200 | -1.20610500 |
| C | -3.72440800 | -1.59143700 | 0.18705500  |
| C | -4.23637500 | -2.73707900 | -0.45533400 |
| C | -4.02996800 | -4.00461400 | 0.08328300  |
| C | -3.30477400 | -4.16283300 | 1.27374800  |
| C | -2.78614500 | -3.02528000 | 1.91735200  |
| C | -2.99511800 | -1.76083200 | 1.38449900  |
| C | -3.09252200 | -5.50577500 | 1.83370100  |
| O | -2.46920600 | -5.74174000 | 2.88011500  |
| H | -8.34879400 | 2.30312700  | -1.57326100 |
| H | -8.56116900 | -0.04449000 | -0.73533300 |
| H | -6.51634400 | -1.33579400 | -0.13979800 |
| H | -6.08133400 | 3.34025100  | -1.77005900 |
| H | -1.59659100 | 3.00558100  | -0.39772100 |
| H | 0.86568400  | 3.19500400  | -0.26105200 |
| H | 1.20349500  | -1.05307200 | -0.74548300 |
| H | -1.23554100 | -1.24243800 | -0.84651500 |

|   |             |             |             |
|---|-------------|-------------|-------------|
| H | 3.52431700  | 4.42302300  | 1.55012600  |
| H | 2.43510600  | 5.31483100  | 3.57995200  |
| H | 1.02130900  | 3.83502400  | 4.98941500  |
| H | 0.70907300  | 1.45667300  | 4.34289700  |
| H | 1.77314500  | 0.57798000  | 2.29390900  |
| H | 5.28115300  | 1.62432400  | 2.45820500  |
| H | 7.68851500  | 2.15806000  | 2.32275700  |
| H | 8.64144300  | 3.10196700  | 0.23067300  |
| H | 7.15810600  | 3.50074000  | -1.72262200 |
| H | 4.75790200  | 2.93704900  | -1.59288400 |
| H | 2.19656200  | 1.21647700  | -3.08613700 |
| H | 3.33899900  | -0.03615900 | -4.88276500 |
| H | 5.20747300  | -1.57979700 | -4.33348700 |
| H | 5.92021700  | -1.85151200 | -1.96864900 |
| H | 4.79526300  | -0.57359600 | -0.17958600 |
| H | -4.76778200 | -2.63153800 | -1.39155800 |
| H | -4.42112500 | -4.87775300 | -0.42550800 |
| H | -2.23209900 | -3.15940000 | 2.83607400  |
| H | -2.60250600 | -0.88832800 | 1.88683200  |
| H | -3.53210900 | -6.33581500 | 1.25647900  |

### **GBY-13**

Total energy: -1874.32945590 a.u.

Charge: 0

Spin: Singlet

Dipole moment: 5.6079 Debye

Function/Basis set: B3LYP/6-311G

|   |             |             |             |
|---|-------------|-------------|-------------|
| C | -7.04597100 | -3.92655900 | 2.06544500  |
| C | -7.47102300 | -2.77981000 | 1.33332400  |
| C | -6.55827400 | -1.91791200 | 0.79084800  |
| N | -5.20890700 | -2.16282500 | 0.96757200  |
| C | -4.75379300 | -3.31240600 | 1.66101600  |
| C | -5.70566800 | -4.19086100 | 2.22037900  |
| C | -4.06785000 | -1.48960700 | 0.49831400  |
| C | -2.97902900 | -2.25702400 | 0.94760800  |
| N | -3.41491900 | -3.36487300 | 1.64968200  |
| C | -1.53672600 | -2.01717400 | 0.80835100  |
| C | -0.65685800 | -3.11410900 | 0.85395500  |
| C | 0.71716900  | -2.93297100 | 0.74005100  |
| C | 1.27366000  | -1.64923800 | 0.58913000  |
| C | 0.39319100  | -0.55146000 | 0.58383600  |
| C | -0.98412900 | -0.72978100 | 0.68337900  |
| C | 2.75201900  | -1.44303300 | 0.50999300  |
| C | 3.55583900  | -2.17297900 | -0.32081900 |
| C | 5.04885300  | -2.16044300 | -0.21809600 |
| C | 3.01033500  | -3.04559200 | -1.40769700 |
| C | 3.28537500  | -0.37623900 | 1.41540600  |
| C | 3.46987400  | -4.36669600 | -1.56306400 |
| C | 2.98155100  | -5.17978300 | -2.58655600 |
| C | 2.03859300  | -4.68236500 | -3.49073000 |
| C | 1.58919100  | -3.36536600 | -3.36185400 |
| C | 2.06868600  | -2.55627400 | -2.33080300 |



|   |             |             |             |
|---|-------------|-------------|-------------|
| C | 5.84339800  | -2.00069800 | -1.36894600 |
| C | 7.23630900  | -2.00735400 | -1.28502900 |
| C | 7.86559300  | -2.19382400 | -0.05084700 |
| C | 7.08955800  | -2.37459900 | 1.09735200  |
| C | 5.69677200  | -2.35737600 | 1.01479700  |
| C | 2.90919400  | -0.33531400 | 2.77098000  |
| C | 3.38879200  | 0.66495000  | 3.61772000  |
| C | 4.23939700  | 1.65748700  | 3.12229300  |
| C | 4.60497300  | 1.64109200  | 1.77355200  |
| C | 4.13370500  | 0.63465700  | 0.92941900  |
| C | -4.14839600 | -0.28318000 | -0.32631100 |
| C | -4.94783300 | 0.81911900  | 0.04857400  |
| C | -5.03269200 | 1.95768900  | -0.74170400 |
| C | -4.31275900 | 2.04994800  | -1.95484500 |
| C | -3.50222400 | 0.94785400  | -2.32017300 |
| C | -3.42341000 | -0.18983300 | -1.53210600 |
| C | -4.33065800 | 3.18421600  | -2.85933900 |
| C | -5.01821700 | 4.36696000  | -2.82145300 |
| C | -4.83377200 | 5.31980500  | -3.87530000 |
| N | -4.67725300 | 6.09002700  | -4.73928300 |
| C | -5.93707800 | 4.74714800  | -1.79617700 |
| N | -6.69291800 | 5.06838600  | -0.96524300 |
| H | -7.78497300 | -4.59033200 | 2.49001300  |
| H | -8.52297200 | -2.58118300 | 1.19515900  |
| H | -6.82747300 | -1.04846100 | 0.21572900  |

|   |             |             |             |
|---|-------------|-------------|-------------|
| H | -5.34051800 | -5.05509000 | 2.75287100  |
| H | -1.07098000 | -4.10179000 | 0.99291300  |
| H | 1.37211800  | -3.79181000 | 0.77578700  |
| H | 0.79536700  | 0.44995800  | 0.51140000  |
| H | -1.62733600 | 0.13835400  | 0.69383100  |
| H | 4.20987700  | -4.75343300 | -0.87537000 |
| H | 3.33904800  | -6.19681200 | -2.68092900 |
| H | 1.66497400  | -5.31016000 | -4.28877300 |
| H | 0.87024100  | -2.96737900 | -4.06626400 |
| H | 1.71911300  | -1.53758500 | -2.23684200 |
| H | 5.36354300  | -1.86824000 | -2.32934500 |
| H | 7.82851400  | -1.87132100 | -2.18055900 |
| H | 8.94554400  | -2.20482000 | 0.01399000  |
| H | 7.56732400  | -2.53150900 | 2.05554400  |
| H | 5.10329500  | -2.49790900 | 1.90704200  |
| H | 2.24227900  | -1.09390700 | 3.15834200  |
| H | 3.09651800  | 0.67173600  | 4.65967600  |
| H | 4.60695600  | 2.43653400  | 3.77695900  |
| H | 5.25420100  | 2.41141200  | 1.37841200  |
| H | 4.42180700  | 0.62702600  | -0.11237300 |
| H | -5.48052200 | 0.79524900  | 0.98930500  |
| H | -5.64715800 | 2.77567000  | -0.40185800 |
| H | -2.94039400 | 0.99166100  | -3.24469000 |
| H | -2.80667100 | -1.02023900 | -1.84310400 |
| H | -3.68418900 | 3.07059500  | -3.72245800 |

## GBY-14

Total energy: -2046.53638541 a.u.

Charge: 0

Spin: Singlet

Dipole moment: 3.3665 Debye

Function/Basis set: B3LYP/6-311G

|   |             |            |             |
|---|-------------|------------|-------------|
| C | -7.23031900 | 1.04823900 | -3.14852600 |
| C | -7.51732900 | 0.69529200 | -1.79871400 |
| C | -6.52094700 | 0.63749400 | -0.86306700 |
| N | -5.22481100 | 0.93056000 | -1.24063900 |
| C | -4.90282100 | 1.26331100 | -2.57811500 |
| C | -5.93891000 | 1.32516700 | -3.53243200 |
| C | -4.01664700 | 0.92265600 | -0.51949500 |
| C | -3.02690900 | 1.27510300 | -1.45835200 |
| N | -3.58250200 | 1.46712700 | -2.70589800 |
| C | -1.58329800 | 1.46544000 | -1.27241300 |
| C | -1.01844100 | 1.86574100 | -0.04852500 |
| C | 0.35739100  | 2.03059600 | 0.08103800  |
| C | 1.22334400  | 1.81176400 | -1.00544000 |
| C | 0.64864900  | 1.46025700 | -2.24141800 |
| C | -0.72482700 | 1.28372300 | -2.37247200 |
| C | 2.70000900  | 2.00195700 | -0.87435800 |
| C | 3.42403400  | 1.44431600 | 0.14237300  |
| C | 4.84052700  | 1.82942600 | 0.43434400  |
| C | 2.86248100  | 0.39324700 | 1.04877800  |
| C | 3.32171900  | 2.84652900 | -1.94243700 |

|   |             |             |             |
|---|-------------|-------------|-------------|
| C | 3.00732200  | 0.49942900  | 2.44468300  |
| C | 2.50895000  | -0.48857400 | 3.29487600  |
| C | 1.87262800  | -1.61593200 | 2.76664700  |
| C | 1.73923700  | -1.74505000 | 1.38102400  |
| C | 2.22795100  | -0.75084800 | 0.53182400  |
| C | 5.82105500  | 0.84130600  | 0.64245800  |
| C | 7.14021300  | 1.19056000  | 0.93386300  |
| C | 7.50383700  | 2.53589200  | 1.04337500  |
| C | 6.53635800  | 3.52765200  | 0.85987900  |
| C | 5.21954600  | 3.17839700  | 0.55764300  |
| C | 2.74177700  | 4.07580200  | -2.30756800 |
| C | 3.30401700  | 4.86238800  | -3.31375900 |
| C | 4.44724000  | 4.42736700  | -3.99029000 |
| C | 5.02113900  | 3.19831500  | -3.65352100 |
| C | 4.46472500  | 2.41666700  | -2.64032200 |
| C | -3.92096400 | 0.53392200  | 0.86640000  |
| C | -3.02451900 | -0.34450000 | 1.43542800  |
| C | -3.13840600 | -0.47845400 | 2.84198400  |
| C | -4.13456400 | 0.28096800  | 3.41095800  |
| S | -4.99214100 | 1.26936500  | 2.15879700  |
| C | -4.52622300 | 0.33386200  | 4.79875600  |
| O | -5.45388100 | 1.02505900  | 5.25671000  |
| H | -8.03398900 | 1.09344400  | -3.86904200 |
| H | -8.52875600 | 0.46909400  | -1.49750200 |
| H | -6.68334300 | 0.37441200  | 0.16799900  |

|   |             |             |             |
|---|-------------|-------------|-------------|
| H | -5.67568400 | 1.58790500  | -4.54503000 |
| H | -1.65558800 | 2.07011800  | 0.79931000  |
| H | 0.76852000  | 2.34279100  | 1.03058200  |
| H | 1.28862900  | 1.31998100  | -3.10205800 |
| H | -1.15676400 | 1.01241600  | -3.32445700 |
| H | 3.51169900  | 1.36164500  | 2.85966400  |
| H | 2.62284100  | -0.38210600 | 4.36581200  |
| H | 1.49875800  | -2.38903600 | 3.42518300  |
| H | 1.26548600  | -2.62293100 | 0.96088500  |
| H | 2.12526700  | -0.85904200 | -0.53877100 |
| H | 5.54451100  | -0.20208600 | 0.57118000  |
| H | 7.88111500  | 0.41514300  | 1.07893100  |
| H | 8.52524900  | 2.80713800  | 1.27523700  |
| H | 6.80525500  | 4.57160100  | 0.95398100  |
| H | 4.47681000  | 3.95093100  | 0.41680500  |
| H | 1.84943900  | 4.41258300  | -1.79730000 |
| H | 2.84845700  | 5.80939400  | -3.57200500 |
| H | 4.88011600  | 5.03417600  | -4.77452300 |
| H | 5.89859100  | 2.84691600  | -4.18040700 |
| H | 4.91319400  | 1.46693400  | -2.38520100 |
| H | -2.29808200 | -0.87965700 | 0.84382600  |
| H | -2.50842200 | -1.13389200 | 3.42676600  |
| H | -3.92549100 | -0.30510200 | 5.46596000  |

### GBY-15

Total energy: -2195.08301479 a.u.

Charge: 0



Spin: Singlet

Dipole moment: 6.8750 Debye

Function/Basis set: B3LYP/6-311G

|   |             |             |             |
|---|-------------|-------------|-------------|
| C | -7.02359000 | -1.39575300 | 3.71326400  |
| C | -7.43732600 | -1.14500400 | 2.37497000  |
| C | -6.51736100 | -0.98886900 | 1.37399800  |
| N | -5.17142200 | -1.08111000 | 1.67331900  |
| C | -4.72949400 | -1.31025700 | 2.99738500  |
| C | -5.68452700 | -1.47328200 | 4.01970100  |
| C | -4.01639700 | -0.93558100 | 0.87732400  |
| C | -2.93425700 | -1.11693500 | 1.76893500  |
| N | -3.38653200 | -1.32947600 | 3.04962300  |
| C | -1.49085500 | -1.13407200 | 1.50203900  |
| C | -0.94709600 | -1.58105300 | 0.28471900  |
| C | 0.42879900  | -1.58273900 | 0.07790800  |
| C | 1.31665100  | -1.14836500 | 1.07857100  |
| C | 0.77062600  | -0.75279700 | 2.31407300  |
| C | -0.60477800 | -0.73905500 | 2.52110100  |
| C | 2.79542300  | -1.15994300 | 0.86164600  |
| C | 3.37499400  | -0.60909000 | -0.24730500 |
| C | 4.81009100  | -0.83317500 | -0.60712600 |
| C | 2.62245700  | 0.27315000  | -1.19452600 |
| C | 3.58525400  | -1.81717000 | 1.94977700  |
| C | 2.69682200  | 0.05952900  | -2.58374900 |
| C | 2.01991700  | 0.89312300  | -3.47499500 |
| C | 1.27075300  | 1.97291000  | -2.99761500 |

|   |             |             |             |
|---|-------------|-------------|-------------|
| C | 1.20425900  | 2.20995700  | -1.62134800 |
| C | 1.87123000  | 1.36795300  | -0.72977700 |
| C | 5.63506200  | 0.25049400  | -0.96217500 |
| C | 6.96938300  | 0.04910400  | -1.31738900 |
| C | 7.50209500  | -1.24298400 | -1.34495100 |
| C | 6.68893900  | -2.33064800 | -1.01483800 |
| C | 5.35774000  | -2.12812900 | -0.64870000 |
| C | 3.19196900  | -3.06889700 | 2.45915800  |
| C | 3.90879200  | -3.68118800 | 3.48793100  |
| C | 5.02309300  | -3.04570900 | 4.04313000  |
| C | 5.41333200  | -1.79322800 | 3.56096800  |
| C | 4.70261900  | -1.18567400 | 2.52524800  |
| C | -4.03531900 | -0.58155500 | -0.51449600 |
| C | -3.18601400 | 0.28452400  | -1.17810700 |
| C | -3.40877800 | 0.38767700  | -2.56439500 |
| C | -4.45444600 | -0.37769500 | -3.05964300 |
| S | -5.20315100 | -1.34117000 | -1.70164900 |
| C | -4.87966700 | -0.39119300 | -4.41440900 |
| C | -5.91264000 | -1.05660200 | -5.03002700 |
| C | -6.11997400 | -0.89013400 | -6.43424500 |
| N | -6.28106500 | -0.74713700 | -7.58294600 |
| C | -6.82101000 | -1.91913300 | -4.34860300 |
| N | -7.57343000 | -2.62558700 | -3.79958600 |
| H | -7.76757700 | -1.52218200 | 4.48613300  |
| H | -8.48645100 | -1.07717000 | 2.13142800  |

|   |             |             |             |
|---|-------------|-------------|-------------|
| H | -6.78371000 | -0.79566400 | 0.34971100  |
| H | -5.32459700 | -1.65328300 | 5.02044000  |
| H | -1.59823000 | -1.94956300 | -0.49456600 |
| H | 0.82549100  | -1.93454500 | -0.86384400 |
| H | 1.43328500  | -0.44869500 | 3.11286000  |
| H | -1.01459800 | -0.43253600 | 3.47227100  |
| H | 3.28850100  | -0.76370400 | -2.96091300 |
| H | 2.08412600  | 0.70581800  | -4.53889500 |
| H | 0.75997300  | 2.62971400  | -3.68965400 |
| H | 0.64507200  | 3.05595600  | -1.24277800 |
| H | 1.81984700  | 1.55975600  | 0.33276800  |
| H | 5.22598500  | 1.25192200  | -0.95512500 |
| H | 7.59001600  | 0.89714400  | -1.57576600 |
| H | 8.53480200  | -1.40056400 | -1.62640300 |
| H | 7.08926400  | -3.33552800 | -1.04431000 |
| H | 4.73482200  | -2.97389100 | -0.39379000 |
| H | 2.32274500  | -3.56074800 | 2.04360100  |
| H | 3.59575900  | -4.64866000 | 3.85805600  |
| H | 5.57550700  | -3.51685800 | 4.84525200  |
| H | 6.26757900  | -1.28826100 | 3.99250600  |
| H | 5.00965100  | -0.21657100 | 2.15812000  |
| H | -2.41751500 | 0.83630100  | -0.66073700 |
| H | -2.82447500 | 1.03165300  | -3.20630300 |
| H | -4.27734000 | 0.23441800  | -5.06484900 |

## Cell-imaging Details

### Materials:

Dulbecco's modified eagle's media (DMEM), trypsin-EDTA solution (0.25% trypsin and 0.02% EDTA in DPBS), fetal bovine serum (FBS), dulbecco's phosphate-buffer saline (DPBS), and antibiotic antimycotic solution (10000 units of penicillin, 10.0 mg of streptomycin, and 25 µg of amphoterin B per mL in 0.9% normal saline), dimethyl sulfoxide (DMSO) (≥99.5%), trypan blue, and 3-(4,5-dimethylthiazol-2-yl)-2,5-diphenyl tetrazolium bromide (MTT) were purchased from HiMedia, India.

### Cells and culture conditions:

Mouse fibroblast cell line (L929) and human triple-negative breast cancer cell line (MDA-MB-231) were procured from NCCS, Pune, India. The cells were cultured with complete DMEM (DMEM supplemented with 10% v/v FBS and 1% v/v antibiotic antimycotic solution), and the incubation conditions were 37°C and 5% CO<sub>2</sub>.

### Methods:

#### Biocompatibility and cytotoxicity assay

The colorimetric 3-(4,5-dimethylthiazol-2-yl)-2,5-diphenyl tetrazolium bromide (MTT) assay was carried out to check the cell viability/toxicity. L929 (mouse fibroblast cell lines) and MDA-MB 231 cells were used to analyze the cell viability and cytotoxicity assay, respectively. The cells were cultured in complete DMEM and were harvested by trypsinization for seeding in the well plate. Briefly, the cellular suspension of ~8,000-10,000 cells/well was seeded in a 96-well plate. Then, the cells were incubated for 24 hours to facilitate the cellular attachment on the surface of the well at 37 °C with 5% CO<sub>2</sub>. After one wash with sterile phosphate buffer, different concentrations (10-100 µg/ml) of luminogens like GBY-12, GBY-14, GBY-13, GBY-15 were added into the wells in a triplicate manner. For positive control, 0.5 % triton X-100 and for growth/negative control, complete DMEM media were used. After 24 hours of treatment with the luminogens the samples were removed, and two gentle PBS washes were given to cells to remove the test samples properly. MTT solution (50 µg/well) was added to each well and further incubated for 2 hours (facilitates the conversion of MTT to formazan). Afterward, DMSO was added to each well to dissolve formazan. The formazan's optical density (OD) was then measured at 570 nm using a plate reader (Tecan Infinite M200 Pro). Depending upon the OD data, cellular viability was calculated for the luminogen-treated wells. [3-4]

#### Percentage cell viability was calculated using the following equation:

$$\text{Cell Viability (\%)} = \frac{\text{Fluorescence intensity of test sample}}{\text{Fluorescence intensity of negative control}} \times 100$$

where test sample intensities are the intensity of the compound.

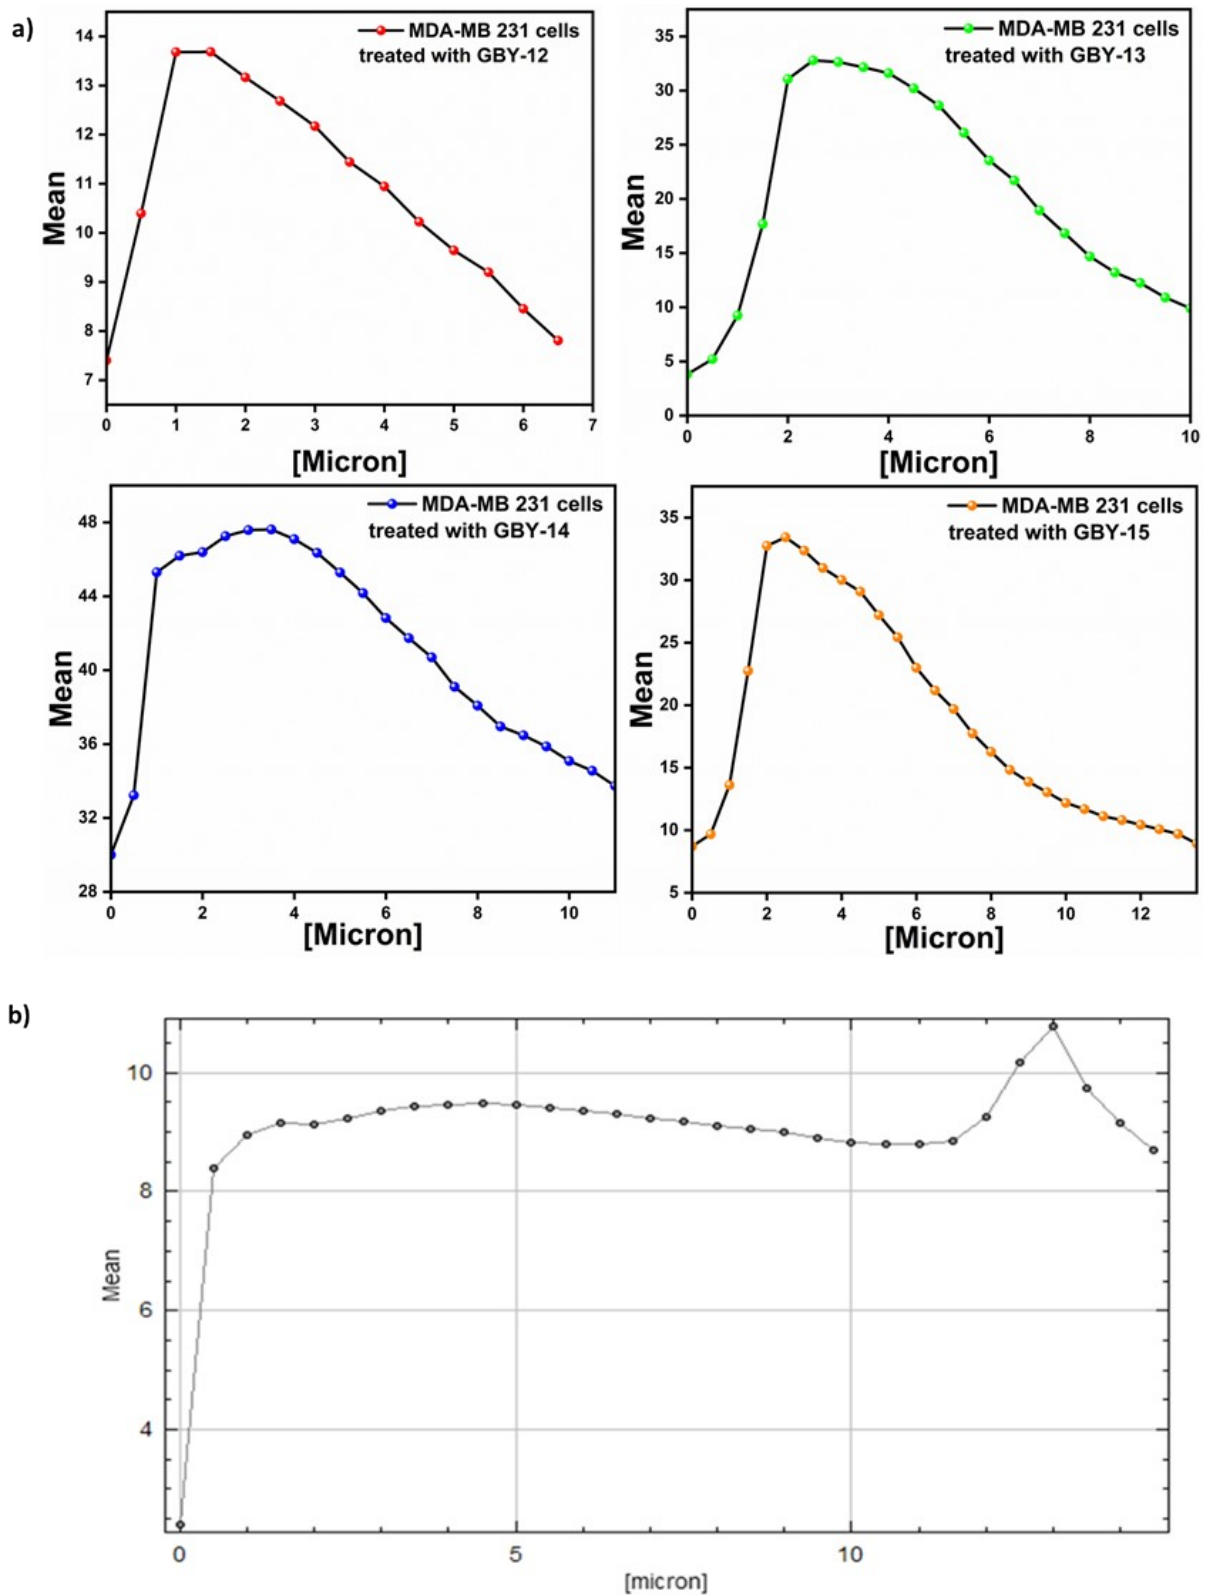

**Figure S17. a)** Fluorescence intensity comparison between **GBY-12**, **GBY-13**, **GBY-14**, and **GBY-15**; **b)** Mean Green Fluorescence Intensity of control cells.

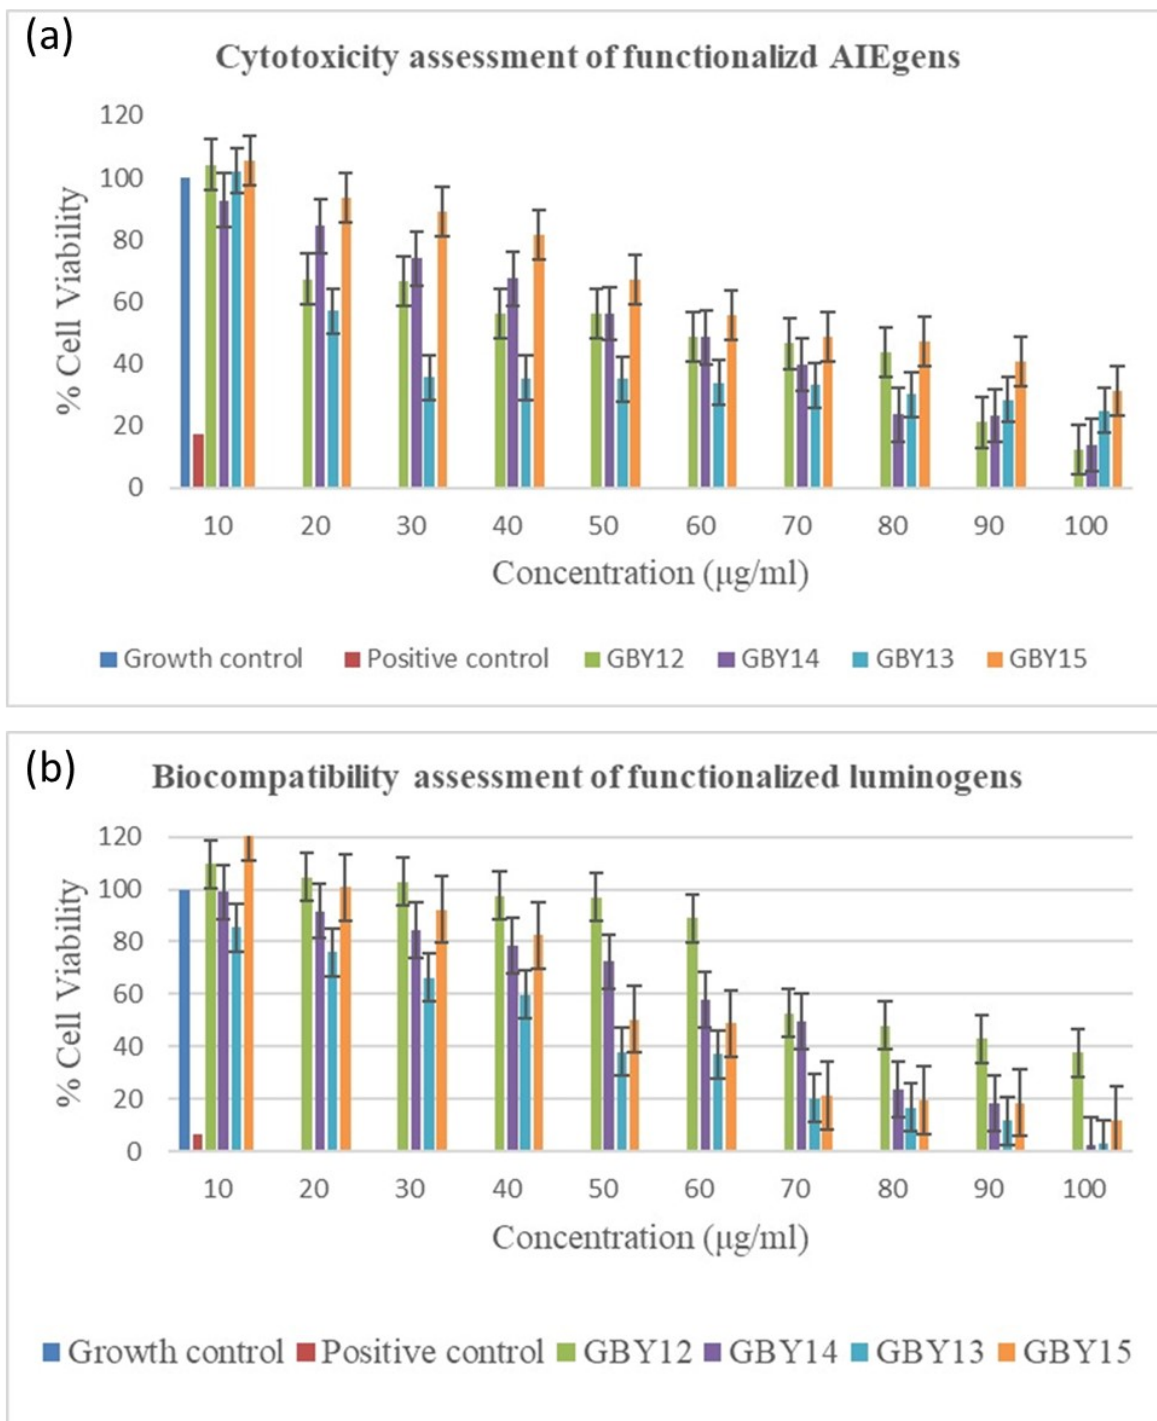

**Figure. S18.** (a) Comparative *in-vitro* cell viability studies on L929 cells reveal the concentration-dependent cytotoxic response of AIEgens **GBY-12**, **GBY-13**, **GBY-14**, and **GBY-15**; (b) *In-vitro* anticancer activity of AIEgens on MDA-MB 231 cells (Note: The results have also been presented as mean±SD. The SD is denoted by the error bar).

## Hydrazine sensing

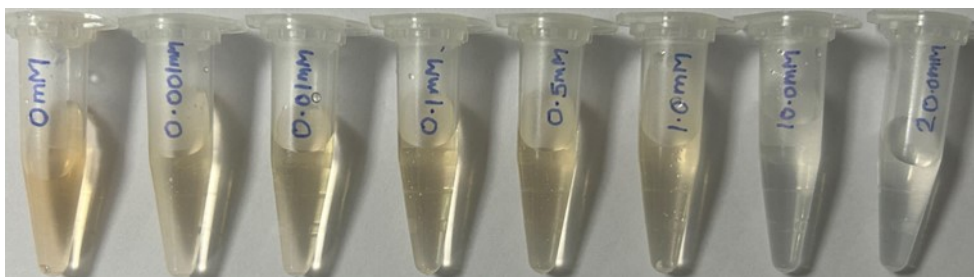

**Figure S19.** A distinct color change of luminogen **GBY-15** observable to the naked eye across different concentrations of hydrazine

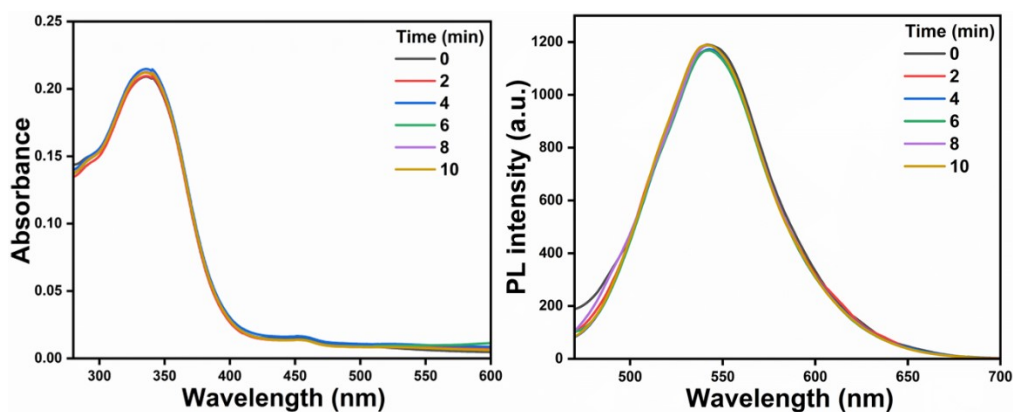

**Figure S20.** Photostability of **GBY-15** in a 10 mM hydrazine hydrate solution.

### Limit of detection

Detection limit calculations for **GBY-15** (1 mM) in THF with  $N_2H_4$  (0 to 0.4 mM) in THF:Water (9.5:0.5 v/v)

$\sigma$  = Standard Deviation obtained from 10 blank emission measurement of THF:Water (9.5:0.5 v/v)

$$\sigma = 6.026$$

and  $k$  is slope obtained from Plot of emission intensity of **GBY-15** in THF:Water (9.5:0.5 v/v) at 465 nm versus concentration of  $N_2H_4$  in THF

$$k = 1344.822$$

$$\text{Detection limit} = 3\sigma/k$$

$$\text{Detection limit} = 3*6.026/1344.822$$

$$\text{Detection limit} = 0.013 \text{ mM}$$

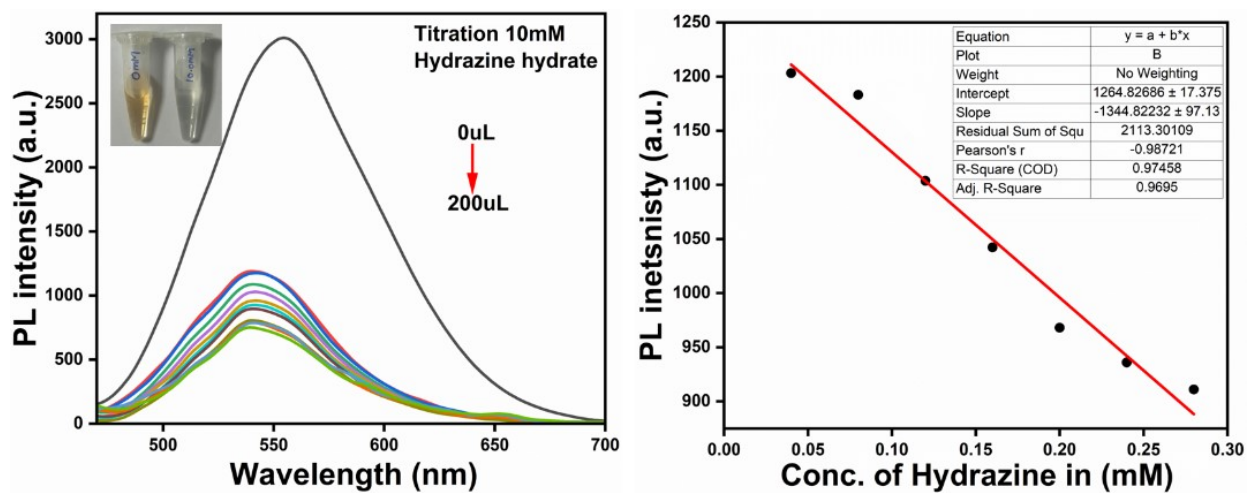

**Figure S21.** Titration of hydrazine with **GBY-15** in aggregated state and Plot of hydrazine concentration vs PL intensity



## References:

1. (a) Z. Lu, Y. Liu, S. Lu, Y. Li, X. Liu, Y. Qin and L. Zheng, A highly selective TPE-based AIE fluorescent probe is developed for the detection of Ag<sup>+</sup>, *RSC Adv.*, 2018, **8**, 19701– 19706. (b) G. Yashwantrao, P. Shetty, P. J. Maleikal, P. Badani, S. Saha, Dehydrative Substitution Reaction in Water for the Preparation of Unsymmetrically Substituted Triarylmethanes: Synthesis, Aggregation-Enhanced Emission, and Mechanofluorochromism, *ChemPlusChem*, 2022, **87**, 7, e202200150. (c) V.P. Jejurkar, G. Yashwantrao, P.K. Reddy, A.P. Ware, S.S. Pingale, R. Srivastava and S. Saha, Rationally Designed Furocarbazoles as Multifunctional Aggregation Induced Emissive Luminogens for the Sensing of Trinitrophenol (TNP) and Cell-imaging, *ChemPhotoChem.*, 2020, **4**, 691-703
2. M. J. Frisch, G. W. Trucks, H. B. Schlegel, G. E. Scuseria, M. A. Robb, J. R. Cheeseman, G. Scalmani, V. Barone, B. Mennucci, G. A. Petersson, H. Nakatsuji, M. Caricato, X. Li, H. P. Hratchian, A. F. Izmaylov, J. Bloino, G. Zheng, J. L. Sonnenberg, M. Hada, M. Ehara, K. Toyota, R. Fukuda, J. Hasegawa, M. Ishida, T. Nakajima, Y. Honda, O. Kitao, H. Nakai, T. Vreven, J.A. Montgomery Jr., J. E. Peralta, F. Ogliaro, M. Bearpark, J. J. Heyd, E. Brothers, K.N. Kudin, V. N. Staroverov, R. Kobayashi, J. Normand, K. Raghavachari, A. Rendell, J.C. Burant, S.S. Iyengar, J. Tomasi, M. Cossi, N. Rega, J. M. Millam, M. Klene, J.E. Knox, J.B. Cross, V. Bakken, C. Adamo, J. Jaramillo, R. Gomperts, R. E. Stratmann, O. Yazyev, A. J. Austin, R. Cammi, C. Pomelli, J. W. Ochterski, R. L. Martin, K. Morokuma, V. G. Zakrzewski, G. A. Voth, P. Salvador, J. J. Dannenberg, S. Dapprich, A. D. Daniels, O. Farkas, J. B. Foresman, J. V. Ortiz, J. Cioslowski and D. J. Fox, *Gaussian 16, Revision A. 03*, Gaussian, Inc., Wallingford CT, **2016**.
3. D. S. Chauhan, B. P. K. Reddy, S. K. Mishra, R. Prasad, M. Dhanka, M. Vats, G. Ravichandran, D. Poojari, O. Mhatre, A. De and Rohit Srivastava, A Comprehensive Evaluation of Degradable and Cost Effective Plasmonic Nanoshells for Localized Photothermolysis of Cancer Cells, *Langmuir.*, 2019, **35**, 24, 7805–7815. DOI: 10.1021/acs.langmuir.8b03460
4. M. K. Kumawat, M. Thakur, R. B. Gurung and R. Srivastava Graphene quantum dots from *Mangifera indica*: application in near-infrared bioimaging and intracellular nano thermometry *ACS Sustain. Chem. Eng.*, 2017, **5**, 1382-1391.

# $^1\text{H}$ and $^{13}\text{C}$ NMR Spectral Reproductions Of 3, 5, GBY-12, GBY-13, GBY-14 and GBY-15

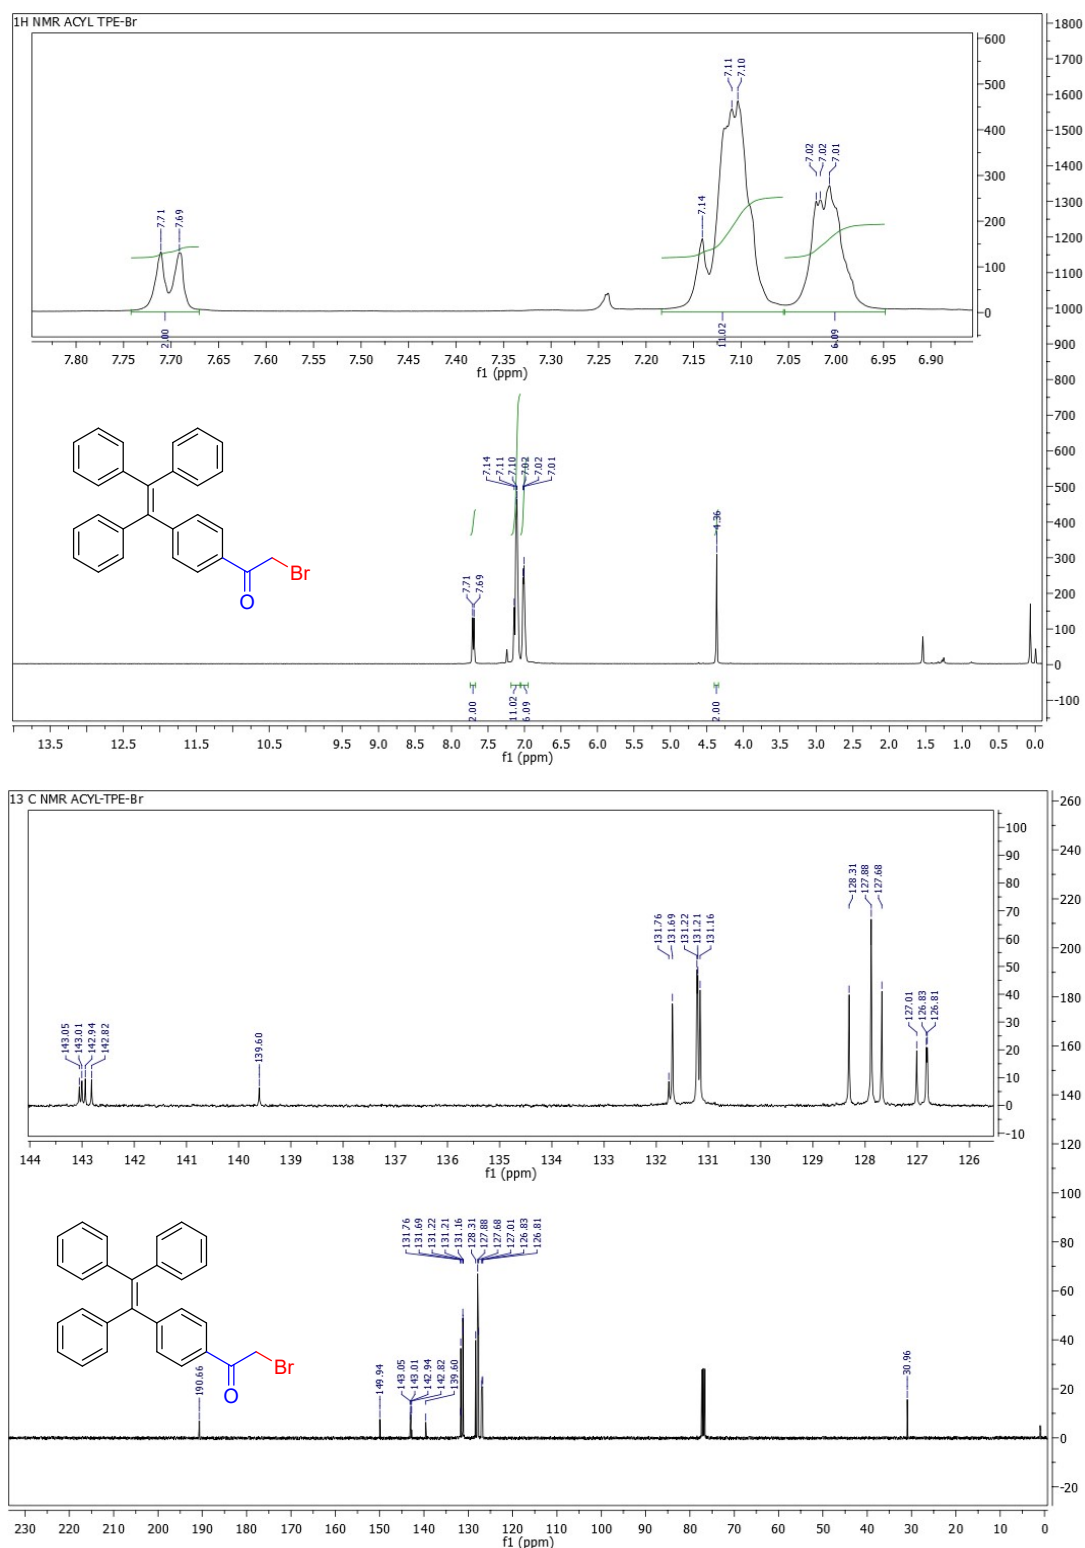

**Figure S22.**  $^1\text{H}$  (400 MHz,  $\text{CDCl}_3$ ) and  $^{13}\text{C}$  NMR (100 MHz,  $\text{CDCl}_3$ ) spectral reproduction of 2-bromo-1-(4-(1,2,2-triphenylvinyl)phenyl)ethan-1-one (3).

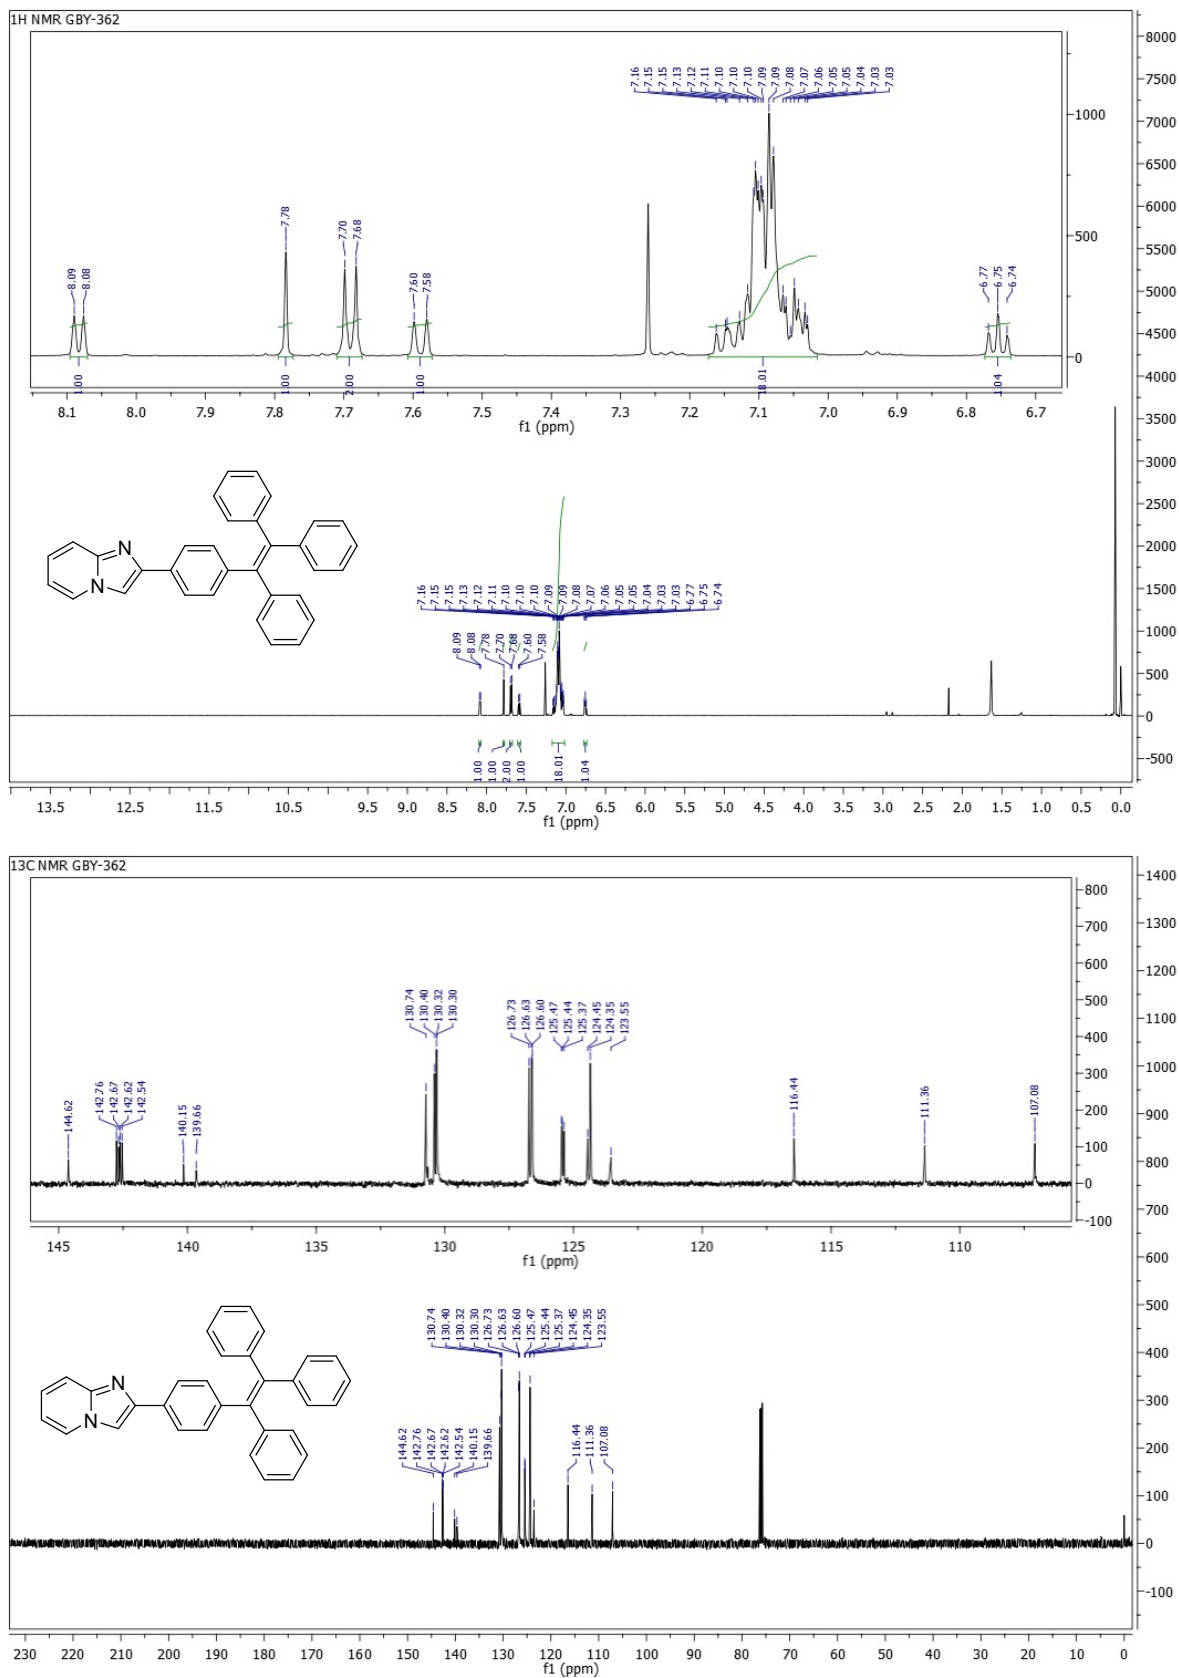

**Figure S23.**  $^1\text{H}$  NMR (500 MHz,  $\text{CDCl}_3$ ) and  $^{13}\text{C}$  NMR (126 MHz,  $\text{CDCl}_3$ ) spectral reproduction of 2-(4-(1,2,2-triphenylvinyl)phenyl)imidazo[1,2-a]pyridine (**5**).

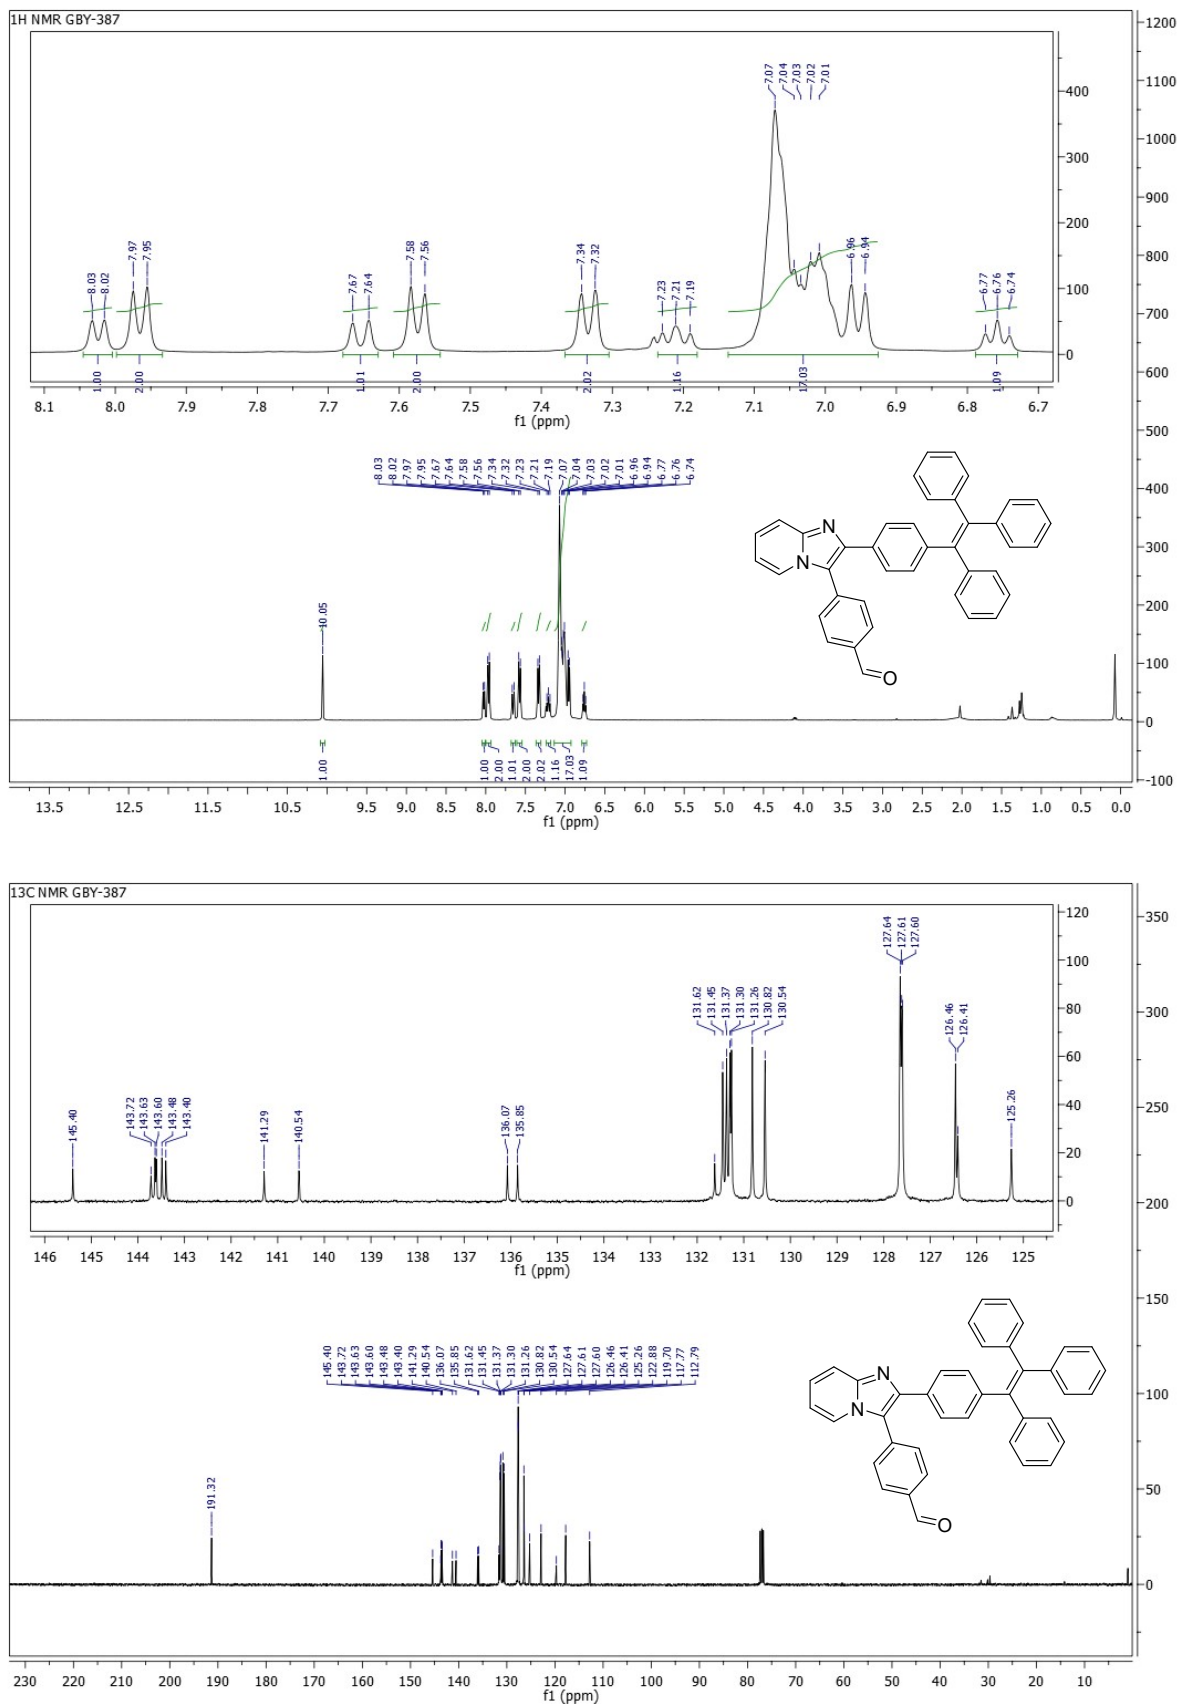

**Figure S24.**  $^1\text{H}$  NMR (500 MHz,  $\text{CDCl}_3$ ) and  $^{13}\text{C}$  NMR (126 MHz,  $\text{CDCl}_3$ ) spectral reproduction of 4-(2-(4-(1,2,2-triphenylvinyl)phenyl)imidazo[1,2-a]pyridin-3-yl)benzaldehyde (**GBY-12**).

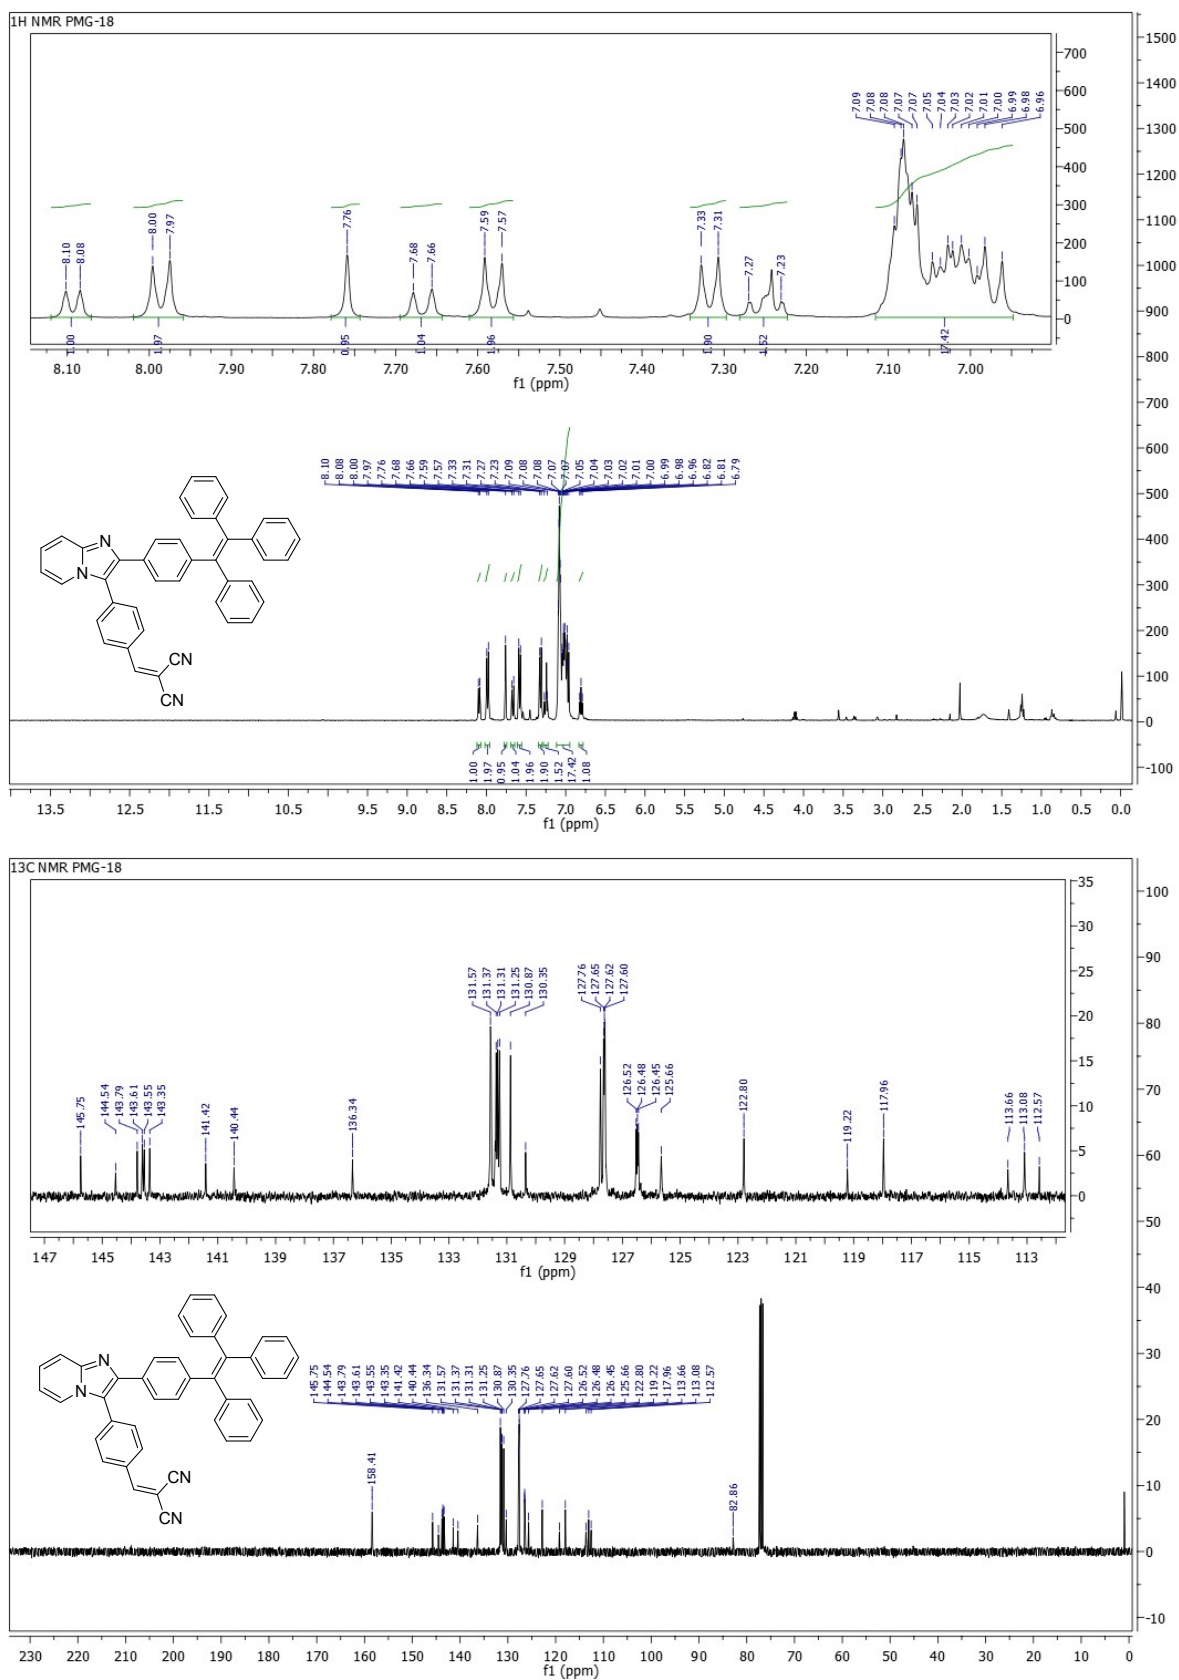

**Figure S25.** <sup>1</sup>H NMR (400 MHz, CDCl<sub>3</sub>) and <sup>13</sup>C NMR (101 MHz, CDCl<sub>3</sub>) spectral reproduction of 2-(4-(2-(4-(1,2,2-triphenylvinyl)phenyl)imidazo[1,2-a]pyridin-3-yl)benzylidene)malononitrile (**GBY-13**).

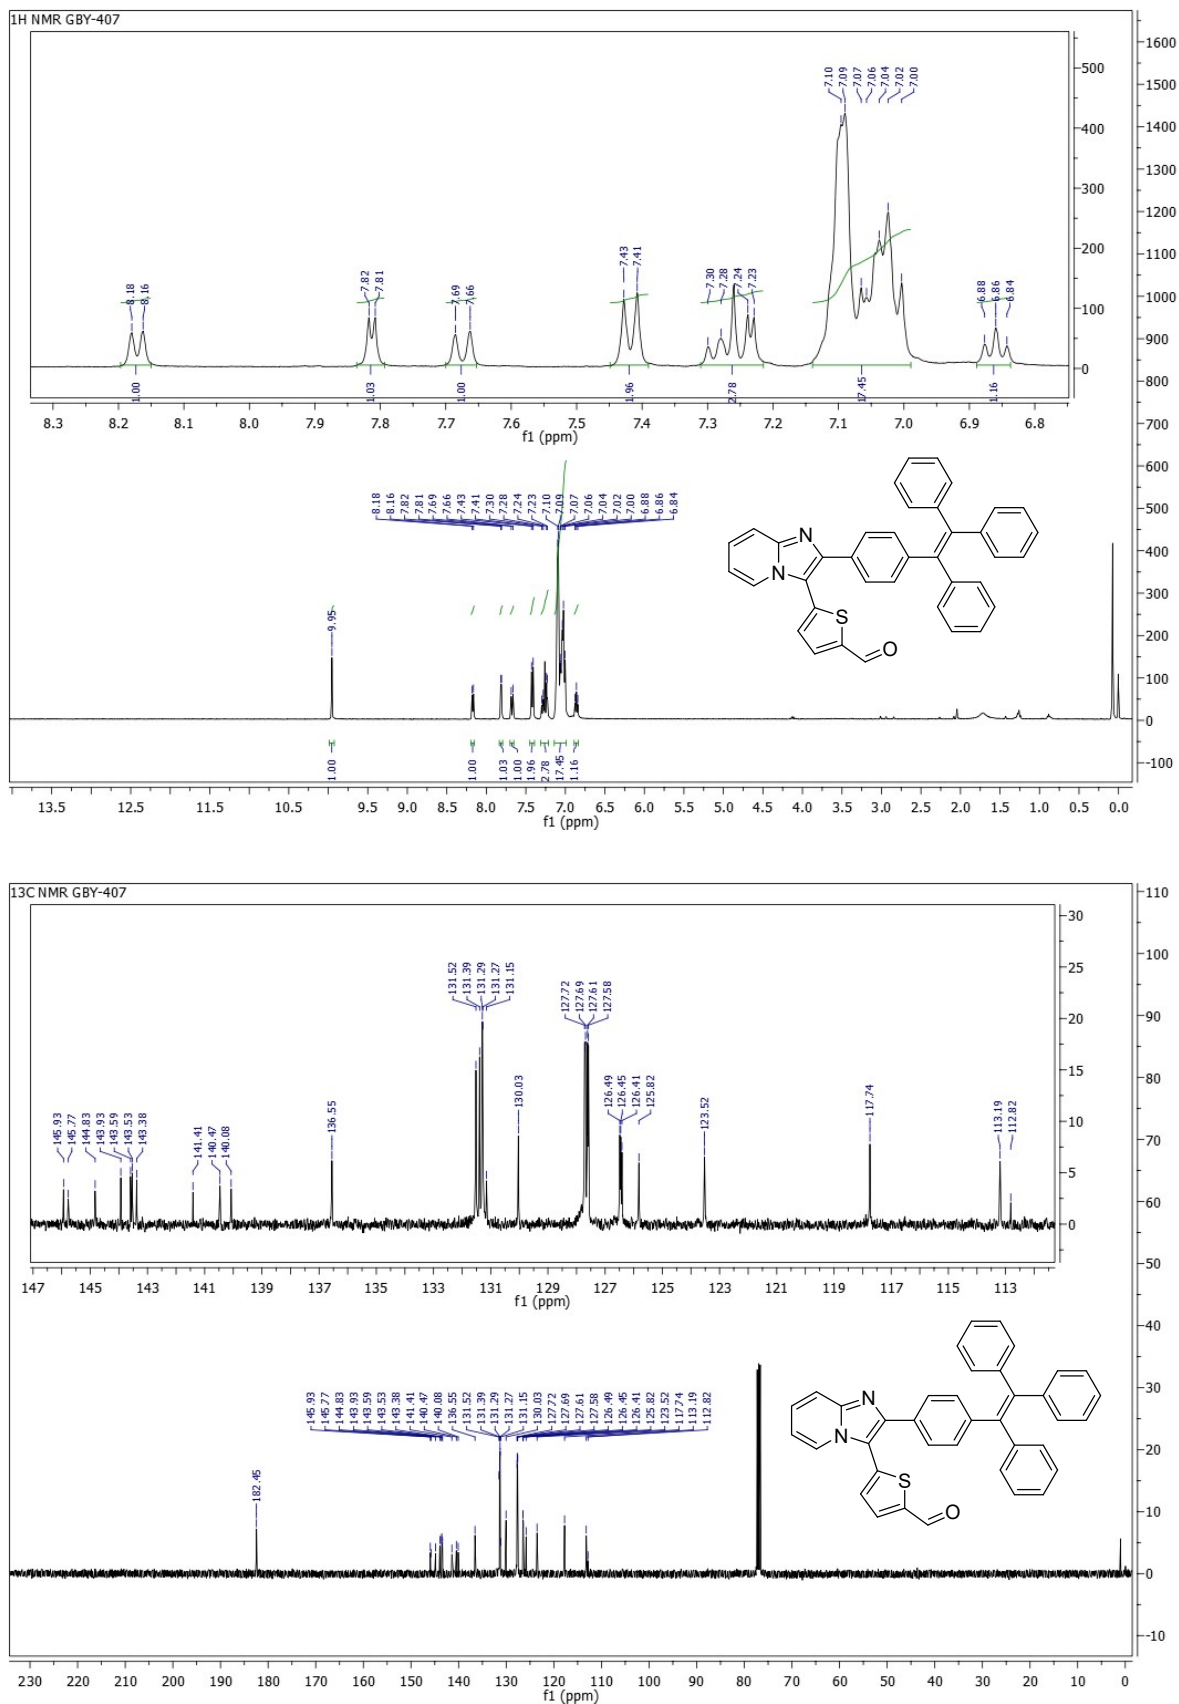

**Figure S26.** <sup>1</sup>H NMR (400 MHz, CDCl<sub>3</sub>) and <sup>13</sup>C NMR (101 MHz, CDCl<sub>3</sub>) spectral reproduction of 5-(2-(4-(1,2,2-triphenylvinyl)phenyl)imidazo[1,2-a]pyridin-3-yl)thiophene-2-carbaldehyde (GBY-14).

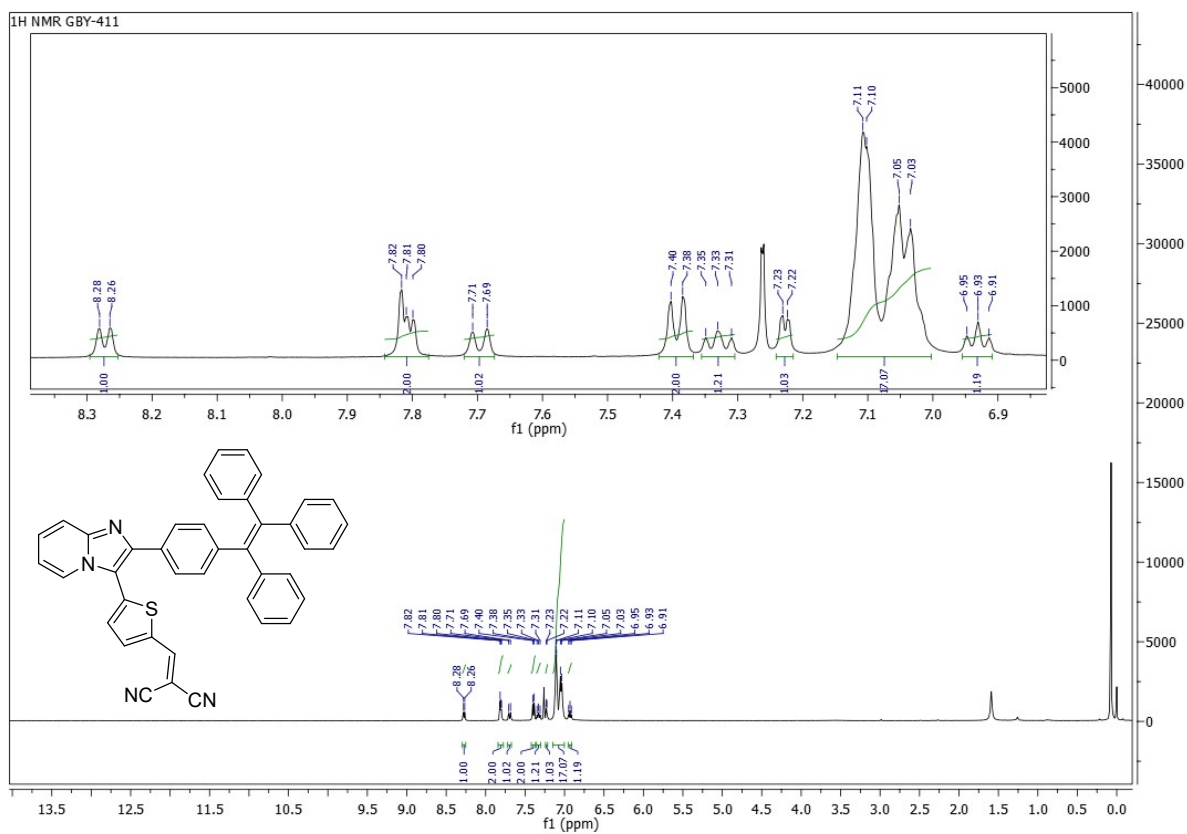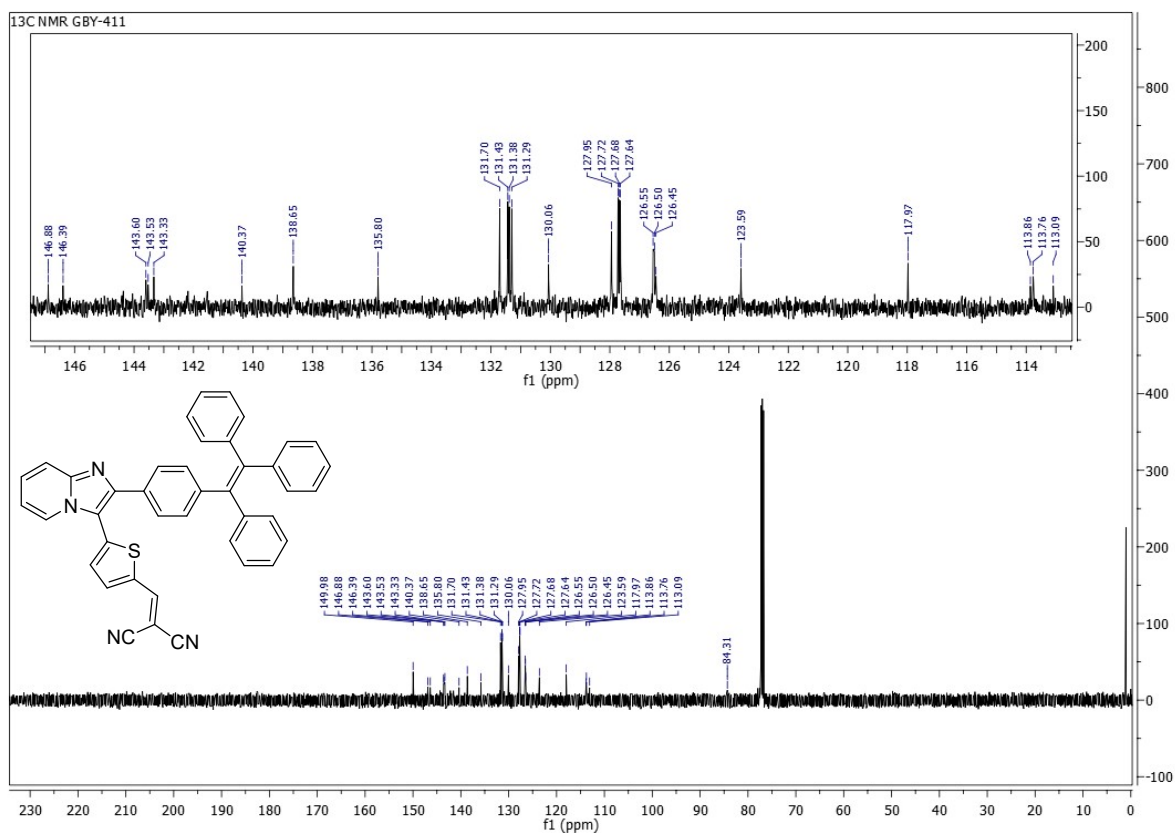

**Figure S27.** <sup>1</sup>H NMR (400 MHz, CDCl<sub>3</sub>) and <sup>13</sup>C NMR (126 MHz, CDCl<sub>3</sub>) spectral reproduction of 2-((5-(2-(4-(1,2,2-triphenylvinyl)phenyl)imidazo[1,2-a]pyridin-3-yl)thiophen-2-yl)methylene)malononitrile (**GBY-15**).



LC-HRMS data of 3, 5, GBY-12, GBY-13, GBY-14, GBY-15

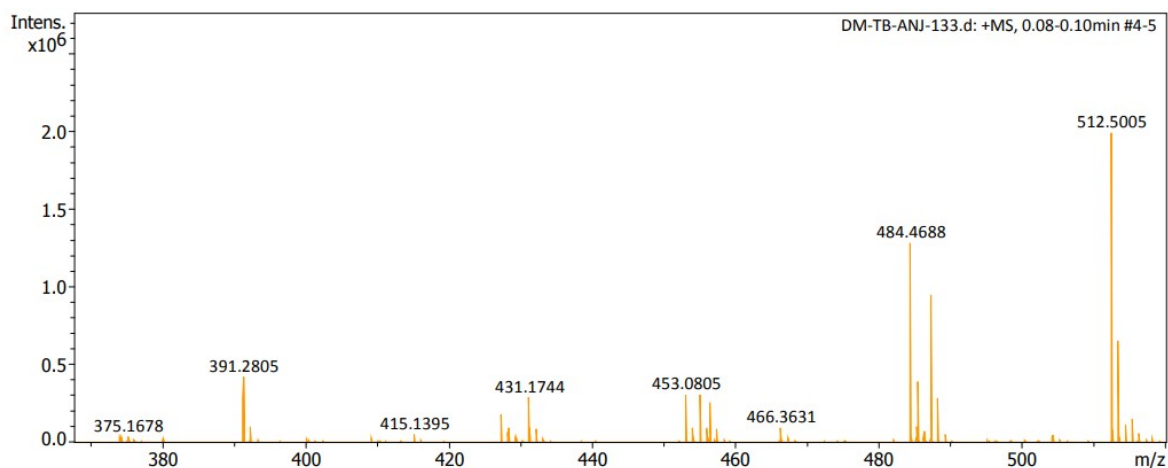

Figure S28. HR-LC-MS spectra of 3.

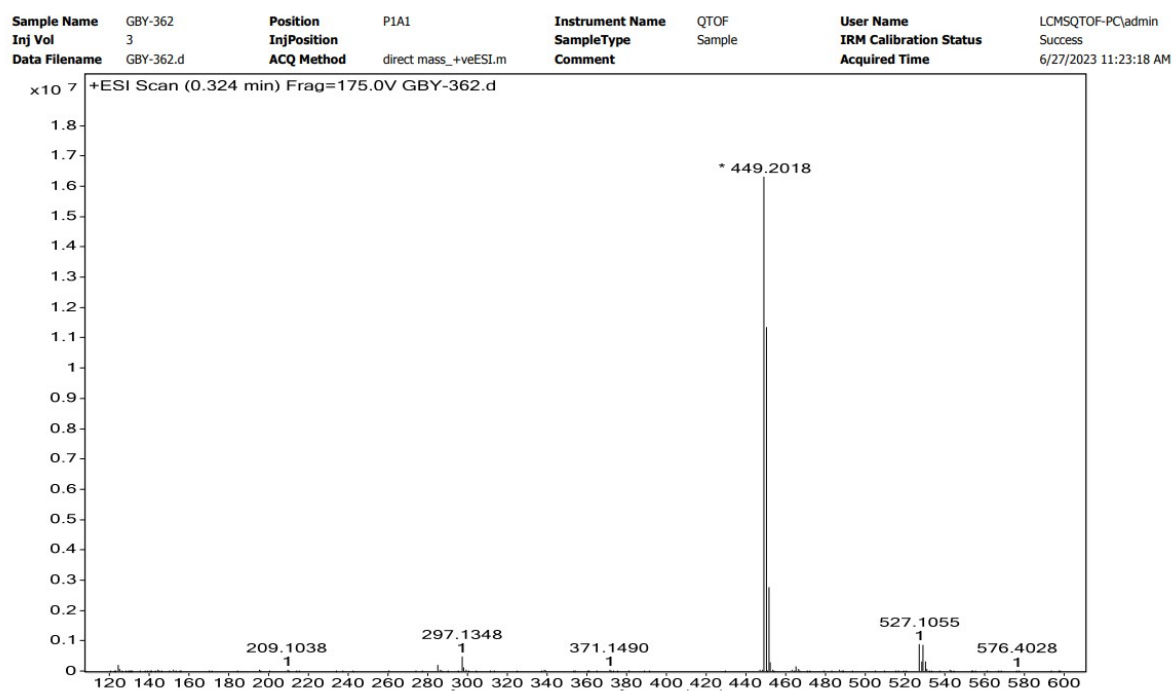

Figure S29. HR-LC-MS spectra of 5.



|               |           |             |                      |                 |        |                        |                       |
|---------------|-----------|-------------|----------------------|-----------------|--------|------------------------|-----------------------|
| Sample Name   | GBY-387   | Position    | P1A4                 | Instrument Name | QTOF   | User Name              | LCMSQTOF-PC\admin     |
| Inj Vol       | 1         | InjPosition |                      | SampleType      | Sample | IRM Calibration Status | Success               |
| Data Filename | GBY-387.d | ACQ Method  | direct mass_+veESI.m | Comment         |        | Acquired Time          | 6/27/2023 11:53:55 AM |

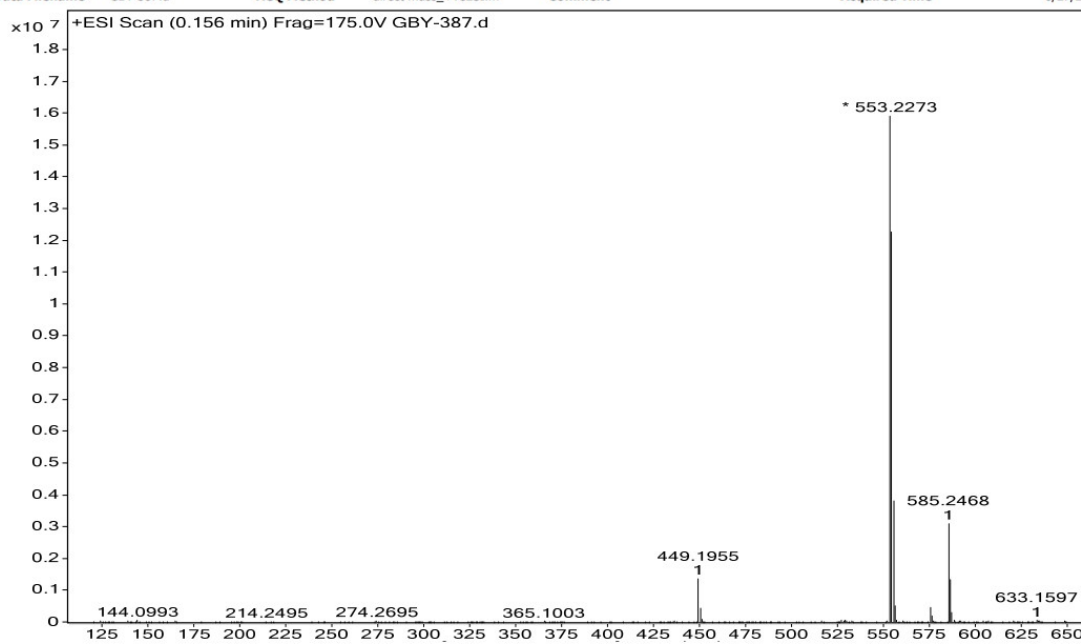

Figure S30. HR-LC-MS spectra of GBY-12.

|               |          |             |                      |                 |        |                        |                       |
|---------------|----------|-------------|----------------------|-----------------|--------|------------------------|-----------------------|
| Sample Name   | PMG-18   | Position    | P1A5                 | Instrument Name | QTOF   | User Name              | LCMSQTOF-PC\admin     |
| Inj Vol       | 1        | InjPosition |                      | SampleType      | Sample | IRM Calibration Status | Success               |
| Data Filename | PMG-18.d | ACQ Method  | direct mass_+veESI.m | Comment         |        | Acquired Time          | 6/27/2023 12:05:16 PM |

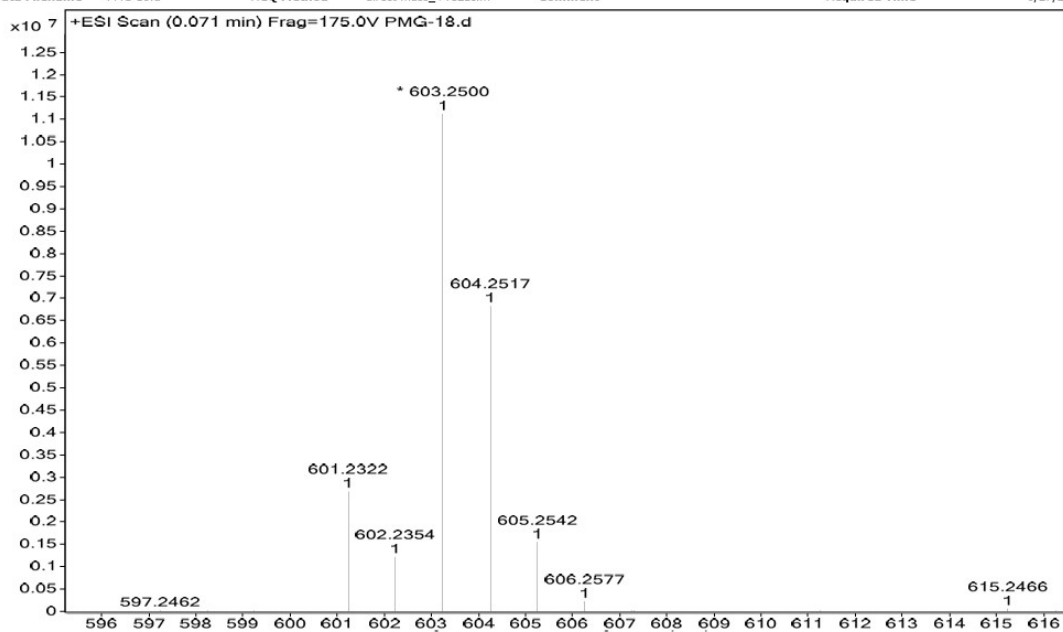

Figure S31. HR-LC-MS spectra of GBY-13.

|               |           |             |                      |                 |        |                        |                       |
|---------------|-----------|-------------|----------------------|-----------------|--------|------------------------|-----------------------|
| Sample Name   | GBY-407   | Position    | PIA6                 | Instrument Name | QTOF   | User Name              | LCMSQTOF-PC\admin     |
| Inj Vol       | 1         | InjPosition |                      | SampleType      | Sample | IRM Calibration Status | Success               |
| Data Filename | GBY-407.d | ACQ Method  | direct mass_+veESI.m | Comment         |        | Acquired Time          | 6/27/2023 12:11:55 PM |

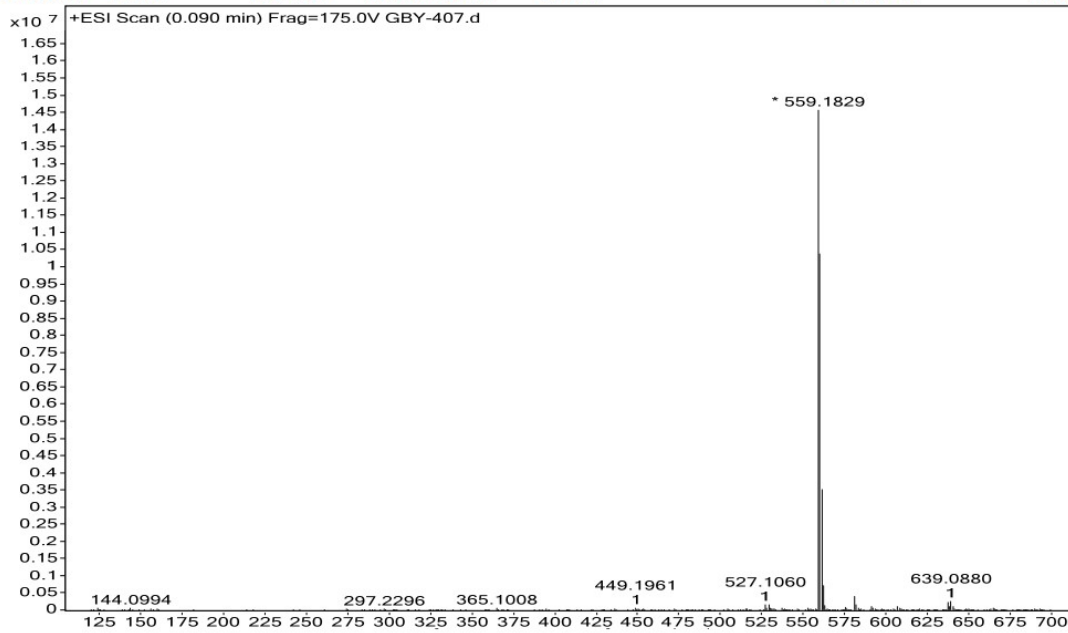

Figure S32. HR-LC-MS spectra of GBY-14.

|               |           |             |                      |                 |        |                        |                       |
|---------------|-----------|-------------|----------------------|-----------------|--------|------------------------|-----------------------|
| Sample Name   | GBY-411   | Position    | PIA7                 | Instrument Name | QTOF   | User Name              | LCMSQTOF-PC\admin     |
| Inj Vol       | 1         | InjPosition |                      | SampleType      | Sample | IRM Calibration Status | Success               |
| Data Filename | GBY-411.d | ACQ Method  | direct mass_+veESI.m | Comment         |        | Acquired Time          | 6/27/2023 12:28:40 PM |

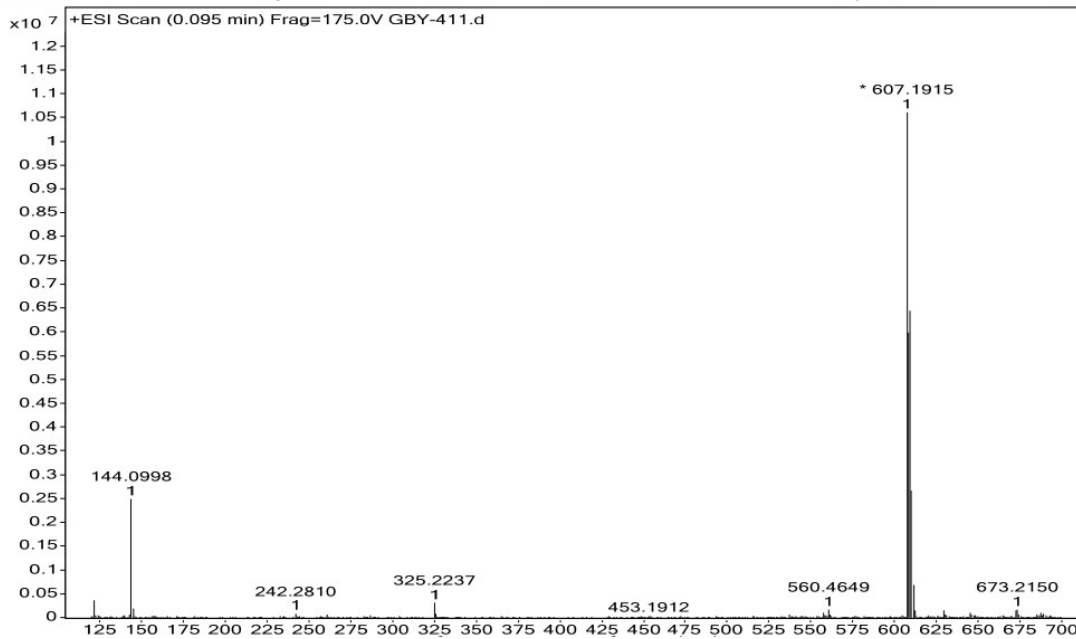

Figure S33. HR-LC-MS spectra of GBY-15.

### Single Crystal XRD Analysis of GBY-12 and GBY-14

The Single crystal XRD data has been collected on single crystal X-ray diffractometer of Bruker Smart Apex Duo diffractometer at 100 K using Mo K $\alpha$  radiation ( $\lambda = 0.71073 \text{ \AA}$ ). The frames were integrated with the Bruker SAINT Software package using a narrow-frame algorithm. Data were corrected for absorption effects using the Multi-Scan method (SADABS). The structure was solved and refined using the Bruker SHELXTL Software Package. The structure figure was generated with ORTEP.

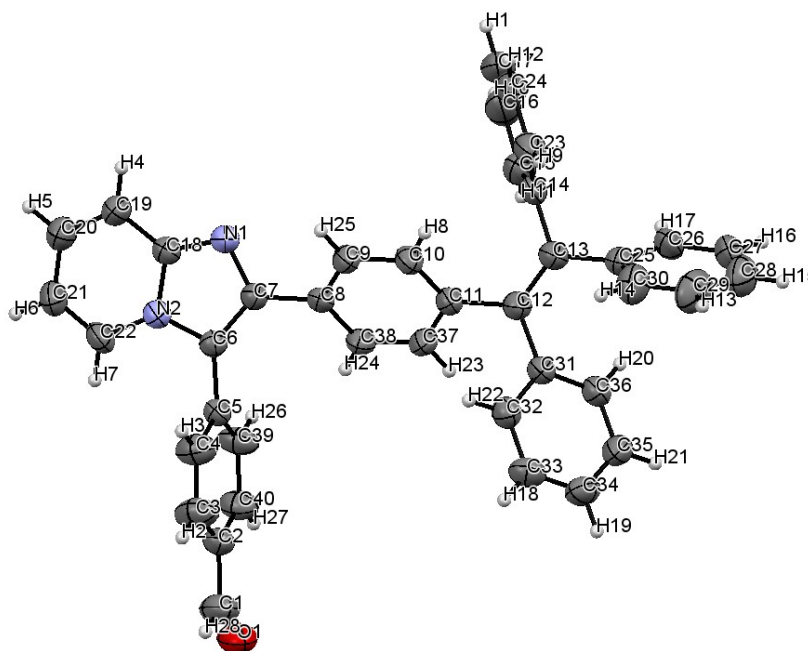

**Figure S34.** X-Ray crystal structure of **GBY-12** (Ellipsoids with 50% probability).

**Table S7.** Single crystal data and structure refinement for **GBY-12**.

|                      |                                                 |
|----------------------|-------------------------------------------------|
| Identification code  | 2382091                                         |
| Empirical formula    | C <sub>40</sub> H <sub>28</sub> ON <sub>2</sub> |
| Formula weight       | 552.64                                          |
| Temperature          | 296K                                            |
| Wavelength           | 0.7107                                          |
| Crystal system       | Triclinic                                       |
| Space group          | P -1                                            |
| Unit cell dimensions |                                                 |
| a(Å)                 | 9.475 (11)                                      |

|                                       |                                 |
|---------------------------------------|---------------------------------|
| <b>b(Å)</b>                           | 10.788 (15)                     |
| <b>c(Å)</b>                           | 15.1924 (19)                    |
| <b>α(Å)</b>                           | 74.047 (4)                      |
| <b>β(Å)</b>                           | 79.474 (3)                      |
| <b>γ(Å)</b>                           | 79.956 (3)                      |
| <b>Volume</b>                         | 1455.4 (3)                      |
| <b>Z</b>                              | 2                               |
| <b>Density (calculated)</b>           | 1.261                           |
| <b>Absorption coefficient</b>         | 0.075                           |
| <b>F(000)</b>                         | 580                             |
| <b>Refinement method</b>              | SHELXL 2017/1 (Sheldrick, 2017) |
| <b>Data / restraints / parameters</b> | 8009/0/388                      |
| <b>Goodness-of-fit on F2</b>          | 0.948                           |
| <b>Final R indices [I&gt;2σ(I)]</b>   | R1 = 0.0873, wR2 = 0.1416       |
| <b>R indices (all data)</b>           | R1 = 0.1766, wR2 = 0.1677       |

$$R_1 = \frac{\sum \| |F_0| - |F_c| \|}{\sum |F_0|}$$

$$R_w = \sqrt{\frac{[\sum \{w(F_0^2 - F_c^2)^2\}]}{[\sum \{w(F_0^2)^2\}]}}$$

**Table S8.** List Torsion angles [°] for luminogen **GBY-12**

| Number | Atom1 | Atom2 | Atom3 | Atom4 | Torsion  |
|--------|-------|-------|-------|-------|----------|
| 1      | C18   | N1    | C7    | C6    | -0.1(4)  |
| 2      | C18   | N1    | C7    | C8    | 178.7(3) |
| 3      | C7    | N1    | C18   | N2    | 0.2(4)   |

|    |     |    |     |     |           |
|----|-----|----|-----|-----|-----------|
| 4  | C7  | N1 | C18 | C19 | -175.7(4) |
| 5  | C18 | N2 | C6  | C5  | 178.9(3)  |
| 6  | C18 | N2 | C6  | C7  | 0.1(4)    |
| 7  | C22 | N2 | C6  | C5  | -4.0(6)   |
| 8  | C22 | N2 | C6  | C7  | 177.2(4)  |
| 9  | C6  | N2 | C18 | N1  | -0.1(4)   |
| 10 | C6  | N2 | C18 | C19 | 176.4(3)  |
| 11 | C22 | N2 | C18 | N1  | -177.6(3) |
| 12 | C22 | N2 | C18 | C19 | -1.1(5)   |
| 13 | C6  | N2 | C22 | C21 | -175.4(4) |
| 14 | C6  | N2 | C22 | H7  | 4.5       |
| 15 | C18 | N2 | C22 | C21 | 1.3(6)    |
| 16 | C18 | N2 | C22 | H7  | -178.7    |
| 17 | O1  | C1 | C2  | C3  | 179.3(5)  |
| 18 | O1  | C1 | C2  | C40 | 0.2(7)    |
| 19 | H28 | C1 | C2  | C3  | -0.6      |
| 20 | H28 | C1 | C2  | C40 | -179.7    |
| 21 | C1  | C2 | C3  | H2  | -0.3      |
| 22 | C1  | C2 | C3  | C4  | 179.6(4)  |
| 23 | C40 | C2 | C3  | H2  | 178.7     |
| 24 | C40 | C2 | C3  | C4  | -1.3(6)   |
| 25 | C1  | C2 | C40 | C39 | 179.8(4)  |
| 26 | C1  | C2 | C40 | H27 | -0.1      |
| 27 | C3  | C2 | C40 | C39 | 0.7(6)    |
| 28 | C3  | C2 | C40 | H27 | -179.2    |
| 29 | C2  | C3 | C4  | H3  | -179.4    |
| 30 | C2  | C3 | C4  | C5  | 0.8(7)    |

|    |     |    |     |     |           |
|----|-----|----|-----|-----|-----------|
| 31 | H2  | C3 | C4  | H3  | 0.6       |
| 32 | H2  | C3 | C4  | C5  | -179.3    |
| 33 | C3  | C4 | C5  | C6  | 176.3(4)  |
| 34 | C3  | C4 | C5  | C39 | 0.5(6)    |
| 35 | H3  | C4 | C5  | C6  | -3.6      |
| 36 | H3  | C4 | C5  | C39 | -179.4    |
| 37 | C4  | C5 | C6  | N2  | -78.8(4)  |
| 38 | C4  | C5 | C6  | C7  | 99.7(5)   |
| 39 | C39 | C5 | C6  | N2  | 96.9(4)   |
| 40 | C39 | C5 | C6  | C7  | -84.7(5)  |
| 41 | C4  | C5 | C39 | H26 | 178.9     |
| 42 | C4  | C5 | C39 | C40 | -1.1(6)   |
| 43 | C6  | C5 | C39 | H26 | 3.1       |
| 44 | C6  | C5 | C39 | C40 | -177.0(4) |
| 45 | N2  | C6 | C7  | N1  | 0.0(4)    |
| 46 | N2  | C6 | C7  | C8  | -178.6(3) |
| 47 | C5  | C6 | C7  | N1  | -178.6(3) |
| 48 | C5  | C6 | C7  | C8  | 2.8(6)    |
| 49 | N1  | C7 | C8  | C9  | 36.2(4)   |
| 50 | N1  | C7 | C8  | C38 | -141.9(3) |
| 51 | C6  | C7 | C8  | C9  | -145.3(4) |
| 52 | C6  | C7 | C8  | C38 | 36.7(5)   |
| 53 | C7  | C8 | C9  | H25 | 1.6       |
| 54 | C7  | C8 | C9  | C10 | -178.5(3) |
| 55 | C38 | C8 | C9  | H25 | 179.7     |
| 56 | C38 | C8 | C9  | C10 | -0.3(5)   |
| 57 | C7  | C8 | C38 | C37 | 178.2(3)  |

|    |     |     |     |     |           |
|----|-----|-----|-----|-----|-----------|
| 58 | C7  | C8  | C38 | H24 | -1.7      |
| 59 | C9  | C8  | C38 | C37 | 0.1(5)    |
| 60 | C9  | C8  | C38 | H24 | -179.8    |
| 61 | C8  | C9  | C10 | H8  | -179      |
| 62 | C8  | C9  | C10 | C11 | 1.0(6)    |
| 63 | H25 | C9  | C10 | H8  | 1         |
| 64 | H25 | C9  | C10 | C11 | -179.1    |
| 65 | C9  | C10 | C11 | C12 | -177.3(3) |
| 66 | C9  | C10 | C11 | C37 | -1.3(5)   |
| 67 | H8  | C10 | C11 | C12 | 2.7       |
| 68 | H8  | C10 | C11 | C37 | 178.7     |
| 69 | C10 | C11 | C12 | C13 | -45.0(6)  |
| 70 | C10 | C11 | C12 | C31 | 132.9(4)  |
| 71 | C37 | C11 | C12 | C13 | 139.2(4)  |
| 72 | C37 | C11 | C12 | C31 | -42.9(5)  |
| 73 | C10 | C11 | C37 | H23 | -178.9    |
| 74 | C10 | C11 | C37 | C38 | 1.1(6)    |
| 75 | C12 | C11 | C37 | H23 | -2.8      |
| 76 | C12 | C11 | C37 | C38 | 177.2(3)  |
| 77 | C11 | C12 | C13 | C14 | -6.3(6)   |
| 78 | C11 | C12 | C13 | C25 | 173.6(3)  |
| 79 | C31 | C12 | C13 | C14 | 176.0(3)  |
| 80 | C31 | C12 | C13 | C25 | -4.1(6)   |
| 81 | C11 | C12 | C31 | C32 | -43.9(5)  |
| 82 | C11 | C12 | C31 | C36 | 134.3(4)  |
| 83 | C13 | C12 | C31 | C32 | 134.0(4)  |
| 84 | C13 | C12 | C31 | C36 | -47.8(5)  |

|     |     |     |     |     |           |
|-----|-----|-----|-----|-----|-----------|
| 85  | C12 | C13 | C14 | C15 | -66.9(6)  |
| 86  | C12 | C13 | C14 | C23 | 115.0(4)  |
| 87  | C25 | C13 | C14 | C15 | 113.2(4)  |
| 88  | C25 | C13 | C14 | C23 | -65.0(5)  |
| 89  | C12 | C13 | C25 | C26 | 115.9(4)  |
| 90  | C12 | C13 | C25 | C30 | -63.4(5)  |
| 91  | C14 | C13 | C25 | C26 | -64.2(5)  |
| 92  | C14 | C13 | C25 | C30 | 116.6(4)  |
| 93  | C13 | C14 | C15 | H11 | 2.2       |
| 94  | C13 | C14 | C15 | C16 | -177.7(4) |
| 95  | C23 | C14 | C15 | H11 | -179.7    |
| 96  | C23 | C14 | C15 | C16 | 0.4(6)    |
| 97  | C13 | C14 | C23 | H9  | -0.4      |
| 98  | C13 | C14 | C23 | C24 | 179.6(4)  |
| 99  | C15 | C14 | C23 | H9  | -178.6    |
| 100 | C15 | C14 | C23 | C24 | 1.4(6)    |
| 101 | C14 | C15 | C16 | H10 | 178       |
| 102 | C14 | C15 | C16 | C17 | -2.0(8)   |
| 103 | H11 | C15 | C16 | H10 | -1.9      |
| 104 | H11 | C15 | C16 | C17 | 178.1     |
| 105 | C15 | C16 | C17 | H1  | -178.3    |
| 106 | C15 | C16 | C17 | C24 | 1.7(8)    |
| 107 | H10 | C16 | C17 | H1  | 1.7       |
| 108 | H10 | C16 | C17 | C24 | -178.3    |
| 109 | C16 | C17 | C24 | C23 | 0.1(8)    |
| 110 | C16 | C17 | C24 | H12 | -180      |
| 111 | H1  | C17 | C24 | C23 | -179.9    |



|     |     |     |     |     |           |
|-----|-----|-----|-----|-----|-----------|
| 112 | H1  | C17 | C24 | H12 | 0         |
| 113 | N1  | C18 | C19 | H4  | -3.9      |
| 114 | N1  | C18 | C19 | C20 | 176.1(4)  |
| 115 | N2  | C18 | C19 | H4  | -179.5    |
| 116 | N2  | C18 | C19 | C20 | 0.5(5)    |
| 117 | C18 | C19 | C20 | H5  | 179.8     |
| 118 | C18 | C19 | C20 | C21 | -0.1(6)   |
| 119 | H4  | C19 | C20 | H5  | -0.2      |
| 120 | H4  | C19 | C20 | C21 | 179.9     |
| 121 | C19 | C20 | C21 | H6  | -179.7    |
| 122 | C19 | C20 | C21 | C22 | 0.3(6)    |
| 123 | H5  | C20 | C21 | H6  | 0.4       |
| 124 | H5  | C20 | C21 | C22 | -179.6    |
| 125 | C20 | C21 | C22 | N2  | -0.9(6)   |
| 126 | C20 | C21 | C22 | H7  | 179.1     |
| 127 | H6  | C21 | C22 | N2  | 179.1     |
| 128 | H6  | C21 | C22 | H7  | -0.9      |
| 129 | C14 | C23 | C24 | C17 | -1.7(7)   |
| 130 | C14 | C23 | C24 | H12 | 178.4     |
| 131 | H9  | C23 | C24 | C17 | 178.4     |
| 132 | H9  | C23 | C24 | H12 | -1.6      |
| 133 | C13 | C25 | C26 | H17 | 3.6       |
| 134 | C13 | C25 | C26 | C27 | -176.4(4) |
| 135 | C30 | C25 | C26 | H17 | -177.1    |
| 136 | C30 | C25 | C26 | C27 | 2.9(6)    |
| 137 | C13 | C25 | C30 | C29 | 178.0(4)  |
| 138 | C13 | C25 | C30 | H14 | -2        |

|     |     |     |     |     |           |
|-----|-----|-----|-----|-----|-----------|
| 139 | C26 | C25 | C30 | C29 | -1.3(6)   |
| 140 | C26 | C25 | C30 | H14 | 178.7     |
| 141 | C25 | C26 | C27 | H16 | 177.9     |
| 142 | C25 | C26 | C27 | C28 | -2.1(7)   |
| 143 | H17 | C26 | C27 | H16 | -2        |
| 144 | H17 | C26 | C27 | C28 | 177.9     |
| 145 | C26 | C27 | C28 | H15 | 179.7     |
| 146 | C26 | C27 | C28 | C29 | -0.3(8)   |
| 147 | H16 | C27 | C28 | H15 | -0.3      |
| 148 | H16 | C27 | C28 | C29 | 179.6     |
| 149 | C27 | C28 | C29 | H13 | -178.1    |
| 150 | C27 | C28 | C29 | C30 | 1.9(8)    |
| 151 | H15 | C28 | C29 | H13 | 1.9       |
| 152 | H15 | C28 | C29 | C30 | -178.1    |
| 153 | C28 | C29 | C30 | C25 | -1.1(7)   |
| 154 | C28 | C29 | C30 | H14 | 178.9     |
| 155 | H13 | C29 | C30 | C25 | 178.9     |
| 156 | H13 | C29 | C30 | H14 | -1.1      |
| 157 | C12 | C31 | C32 | H22 | 0.6       |
| 158 | C12 | C31 | C32 | C33 | -179.5(4) |
| 159 | C36 | C31 | C32 | H22 | -177.8    |
| 160 | C36 | C31 | C32 | C33 | 2.1(6)    |
| 161 | C12 | C31 | C36 | C35 | 179.4(4)  |
| 162 | C12 | C31 | C36 | H20 | -0.6      |
| 163 | C32 | C31 | C36 | C35 | -2.3(6)   |
| 164 | C32 | C31 | C36 | H20 | 177.7     |
| 165 | C31 | C32 | C33 | H18 | 179       |

|     |     |     |     |     |         |
|-----|-----|-----|-----|-----|---------|
| 166 | C31 | C32 | C33 | C34 | -1.0(6) |
| 167 | H22 | C32 | C33 | H18 | -1.1    |
| 168 | H22 | C32 | C33 | C34 | 178.9   |
| 169 | C32 | C33 | C34 | H19 | 179.8   |
| 170 | C32 | C33 | C34 | C35 | -0.2(7) |
| 171 | H18 | C33 | C34 | H19 | -0.1    |
| 172 | H18 | C33 | C34 | C35 | 179.9   |
| 173 | C33 | C34 | C35 | H21 | 180     |
| 174 | C33 | C34 | C35 | C36 | 0.0(7)  |
| 175 | H19 | C34 | C35 | H21 | 0       |
| 176 | H19 | C34 | C35 | C36 | -179.9  |
| 177 | C34 | C35 | C36 | C31 | 1.2(6)  |
| 178 | C34 | C35 | C36 | H20 | -178.7  |
| 179 | H21 | C35 | C36 | C31 | -178.7  |
| 180 | H21 | C35 | C36 | H20 | 1.3     |
| 181 | C11 | C37 | C38 | C8  | -0.5(6) |
| 182 | C11 | C37 | C38 | H24 | 179.4   |
| 183 | H23 | C37 | C38 | C8  | 179.5   |
| 184 | H23 | C37 | C38 | H24 | -0.6    |
| 185 | C5  | C39 | C40 | C2  | 0.6(6)  |
| 186 | C5  | C39 | C40 | H27 | -179.6  |
| 187 | H26 | C39 | C40 | C2  | -179.5  |
| 188 | H26 | C39 | C40 | H27 | 0.4     |

**GBY-14**

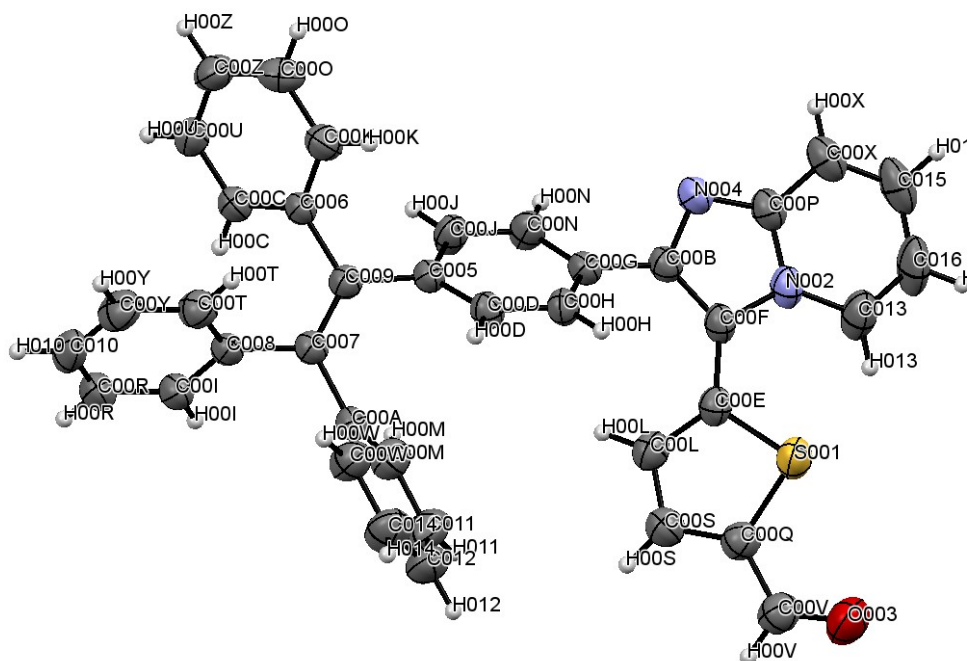

**Figure S35.** X-Ray crystal structure of **GBY-14** (Ellipsoids with 50% probability).

**Table S9.** Single crystal data and structure refinement for **GBY-14**.

|                             |                                                   |
|-----------------------------|---------------------------------------------------|
| <b>Identification code</b>  | 2382114                                           |
| <b>Empirical formula</b>    | C <sub>38</sub> H <sub>26</sub> N <sub>2</sub> OS |
| <b>Formula weight</b>       | 558.67                                            |
| <b>Temperature</b>          | 296K                                              |
| <b>Wavelength</b>           | 0.7107                                            |
| <b>Crystal system</b>       | Triclinic                                         |
| <b>Space group</b>          | P -1                                              |
| <b>Unit cell dimensions</b> |                                                   |
| <b>a(Å)</b>                 | 9.279 (7)                                         |
| <b>b(Å)</b>                 | 9.298 (6)                                         |

|                                         |                                 |
|-----------------------------------------|---------------------------------|
| <b>c(Å)</b>                             | 16.663 (13)                     |
| <b>a(Å)</b>                             | 90.523 (2)                      |
| <b>β(Å)</b>                             | 98.773 (2)                      |
| <b>γ(Å)</b>                             | 94.140 (2)                      |
| <b>Volume</b>                           | 1416.97 (18)                    |
| <b>Z</b>                                | 18                              |
| <b>Density (calculated)</b>             | 1.584                           |
| <b>Absorption coefficient</b>           | 0.757                           |
| <b>F(000)</b>                           | 684                             |
| <b>Refinement method</b>                | SHELXL 2019/3 (Sheldrick, 2015) |
| <b>Data / restraints / parameters</b>   | 5352/0/379                      |
| <b>Goodness-of-fit on F2</b>            | 1.027                           |
| <b>Final R indices [I&gt;2sigma(I)]</b> | R1 = 0.0675, wR2 = 0.1257       |
| <b>R indices (all data)</b>             | R1 = 0.1331, wR2 = 0.1481       |

$$R_1 = \frac{\sum \left| |F_0| - |F_c| \right|}{\sum |F_0|}$$

$$R_w = \sqrt{\frac{\left[ \sum \{w(F_0^2 - F_c^2)^2\} \right]}{\left[ \sum \{w(F_0^2)^2\} \right]}}$$

**Table S10.** List Torsion angles [°] for luminogen **GBY-14**

| Number | Atom1 | Atom2 | Atom3 | Atom4 | Torsion  |
|--------|-------|-------|-------|-------|----------|
| 1      | C00Q  | S001  | C00E  | C00F  | 178.5(2) |
| 2      | C00Q  | S001  | C00E  | C00L  | 0.9(2)   |
| 3      | C00E  | S001  | C00Q  | C00S  | -0.9(2)  |
| 4      | C00E  | S001  | C00Q  | C00V  | 174.5(2) |

|    |      |      |      |      |           |
|----|------|------|------|------|-----------|
| 5  | C00P | N002 | C00F | C00B | -0.0(3)   |
| 6  | C00P | N002 | C00F | C00E | 179.3(3)  |
| 7  | C013 | N002 | C00F | C00B | -176.7(3) |
| 8  | C013 | N002 | C00F | C00E | 2.7(4)    |
| 9  | C00F | N002 | C00P | N004 | -0.6(3)   |
| 10 | C00F | N002 | C00P | C00X | 179.5(2)  |
| 11 | C013 | N002 | C00P | N004 | 176.5(2)  |
| 12 | C013 | N002 | C00P | C00X | -3.3(4)   |
| 13 | C00F | N002 | C013 | H013 | 0.2       |
| 14 | C00F | N002 | C013 | C016 | -179.9(3) |
| 15 | C00P | N002 | C013 | H013 | -176.1    |
| 16 | C00P | N002 | C013 | C016 | 3.8(4)    |
| 17 | C00P | N004 | C00B | C00F | -1.1(3)   |
| 18 | C00P | N004 | C00B | C00G | 178.3(2)  |
| 19 | C00B | N004 | C00P | N002 | 1.1(3)    |
| 20 | C00B | N004 | C00P | C00X | -179.1(3) |
| 21 | C00D | C005 | C009 | C006 | 137.7(3)  |
| 22 | C00D | C005 | C009 | C007 | -42.4(4)  |
| 23 | C00J | C005 | C009 | C006 | -42.1(3)  |
| 24 | C00J | C005 | C009 | C007 | 137.9(3)  |
| 25 | C009 | C005 | C00D | H00D | -3.3      |
| 26 | C009 | C005 | C00D | C00H | 176.7(2)  |
| 27 | C00J | C005 | C00D | H00D | 176.5     |
| 28 | C00J | C005 | C00D | C00H | -3.5(4)   |
| 29 | C009 | C005 | C00J | H00J | 2.7       |
| 30 | C009 | C005 | C00J | C00N | -177.3(2) |
| 31 | C00D | C005 | C00J | H00J | -177      |

|    |      |      |      |      |           |
|----|------|------|------|------|-----------|
| 32 | C00D | C005 | C00J | C00N | 2.9(4)    |
| 33 | C00C | C006 | C009 | C005 | 123.8(3)  |
| 34 | C00C | C006 | C009 | C007 | -56.2(4)  |
| 35 | C00K | C006 | C009 | C005 | -56.5(3)  |
| 36 | C00K | C006 | C009 | C007 | 123.6(3)  |
| 37 | C009 | C006 | C00C | H00C | -3.1      |
| 38 | C009 | C006 | C00C | C00U | 176.9(2)  |
| 39 | C00K | C006 | C00C | H00C | 177.2     |
| 40 | C00K | C006 | C00C | C00U | -2.9(4)   |
| 41 | C009 | C006 | C00K | H00K | 3         |
| 42 | C009 | C006 | C00K | C00O | -177.0(2) |
| 43 | C00C | C006 | C00K | H00K | -177.2    |
| 44 | C00C | C006 | C00K | C00O | 2.8(4)    |
| 45 | C009 | C007 | C008 | C00I | 112.8(3)  |
| 46 | C009 | C007 | C008 | C00T | -66.7(4)  |
| 47 | C00A | C007 | C008 | C00I | -66.5(3)  |
| 48 | C00A | C007 | C008 | C00T | 114.1(3)  |
| 49 | C008 | C007 | C009 | C005 | 179.5(2)  |
| 50 | C008 | C007 | C009 | C006 | -0.5(4)   |
| 51 | C00A | C007 | C009 | C005 | -1.3(4)   |
| 52 | C00A | C007 | C009 | C006 | 178.6(2)  |
| 53 | C008 | C007 | C00A | C00M | 123.4(3)  |
| 54 | C008 | C007 | C00A | C00W | -56.6(3)  |
| 55 | C009 | C007 | C00A | C00M | -55.8(4)  |
| 56 | C009 | C007 | C00A | C00W | 124.2(3)  |
| 57 | C007 | C008 | C00I | H00I | 2.9       |
| 58 | C007 | C008 | C00I | C00R | -177.1(3) |

|    |      |      |      |      |           |
|----|------|------|------|------|-----------|
| 59 | C00T | C008 | C00I | H00I | -177.6    |
| 60 | C00T | C008 | C00I | C00R | 2.4(4)    |
| 61 | C007 | C008 | C00T | H00T | -1.4      |
| 62 | C007 | C008 | C00T | C00Y | 178.5(3)  |
| 63 | C00I | C008 | C00T | H00T | 179.1     |
| 64 | C00I | C008 | C00T | C00Y | -1.0(4)   |
| 65 | C007 | C00A | C00M | H00M | -0.5      |
| 66 | C007 | C00A | C00M | C011 | 179.5(3)  |
| 67 | C00W | C00A | C00M | H00M | 179.5     |
| 68 | C00W | C00A | C00M | C011 | -0.5(4)   |
| 69 | C007 | C00A | C00W | H00W | 1.5       |
| 70 | C007 | C00A | C00W | C014 | -178.6(3) |
| 71 | C00M | C00A | C00W | H00W | -178.5    |
| 72 | C00M | C00A | C00W | C014 | 1.4(4)    |
| 73 | N004 | C00B | C00F | N002 | 0.7(3)    |
| 74 | N004 | C00B | C00F | C00E | -178.6(3) |
| 75 | C00G | C00B | C00F | N002 | -178.7(3) |
| 76 | C00G | C00B | C00F | C00E | 2.1(5)    |
| 77 | N004 | C00B | C00G | C00H | -134.2(3) |
| 78 | N004 | C00B | C00G | C00N | 43.9(4)   |
| 79 | C00F | C00B | C00G | C00H | 45.1(4)   |
| 80 | C00F | C00B | C00G | C00N | -136.8(3) |
| 81 | C006 | C00C | C00U | H00U | -179.5    |
| 82 | C006 | C00C | C00U | C00Z | 0.5(4)    |
| 83 | H00C | C00C | C00U | H00U | 0.5       |
| 84 | H00C | C00C | C00U | C00Z | -179.5    |
| 85 | C005 | C00D | C00H | C00G | 0.8(4)    |



|     |      |      |      |      |           |
|-----|------|------|------|------|-----------|
| 86  | C005 | C00D | C00H | H00H | -179.1    |
| 87  | H00D | C00D | C00H | C00G | -179.1    |
| 88  | H00D | C00D | C00H | H00H | 0.9       |
| 89  | S001 | C00E | C00F | N002 | 28.8(4)   |
| 90  | S001 | C00E | C00F | C00B | -152.0(3) |
| 91  | C00L | C00E | C00F | N002 | -154.0(3) |
| 92  | C00L | C00E | C00F | C00B | 25.2(5)   |
| 93  | S001 | C00E | C00L | H00L | 179.3     |
| 94  | S001 | C00E | C00L | C00S | -0.7(3)   |
| 95  | C00F | C00E | C00L | H00L | 1.8       |
| 96  | C00F | C00E | C00L | C00S | -178.2(3) |
| 97  | C00B | C00G | C00H | C00D | -179.4(3) |
| 98  | C00B | C00G | C00H | H00H | 0.6       |
| 99  | C00N | C00G | C00H | C00D | 2.5(4)    |
| 100 | C00N | C00G | C00H | H00H | -177.5    |
| 101 | C00B | C00G | C00N | C00J | 178.8(3)  |
| 102 | C00B | C00G | C00N | H00N | -1.2      |
| 103 | C00H | C00G | C00N | C00J | -3.0(4)   |
| 104 | C00H | C00G | C00N | H00N | 177       |
| 105 | C008 | C00I | C00R | H00R | 177.9     |
| 106 | C008 | C00I | C00R | C010 | -2.2(4)   |
| 107 | H00I | C00I | C00R | H00R | -2.1      |
| 108 | H00I | C00I | C00R | C010 | 177.9     |
| 109 | C005 | C00J | C00N | C00G | 0.3(4)    |
| 110 | C005 | C00J | C00N | H00N | -179.7    |
| 111 | H00J | C00J | C00N | C00G | -179.7    |
| 112 | H00J | C00J | C00N | H00N | 0.3       |

|     |      |      |      |      |           |
|-----|------|------|------|------|-----------|
| 113 | C006 | C00K | C00O | H00O | 179.7     |
| 114 | C006 | C00K | C00O | C00Z | -0.3(4)   |
| 115 | H00K | C00K | C00O | H00O | -0.3      |
| 116 | H00K | C00K | C00O | C00Z | 179.7     |
| 117 | C00E | C00L | C00S | C00Q | 0.0(4)    |
| 118 | C00E | C00L | C00S | H00S | -180      |
| 119 | H00L | C00L | C00S | C00Q | -180      |
| 120 | H00L | C00L | C00S | H00S | 0         |
| 121 | C00A | C00M | C011 | H011 | 178.9     |
| 122 | C00A | C00M | C011 | C012 | -1.0(4)   |
| 123 | H00M | C00M | C011 | H011 | -1.1      |
| 124 | H00M | C00M | C011 | C012 | 179       |
| 125 | C00K | C00O | C00Z | C00U | -2.1(4)   |
| 126 | C00K | C00O | C00Z | H00Z | 178       |
| 127 | H00O | C00O | C00Z | C00U | 177.9     |
| 128 | H00O | C00O | C00Z | H00Z | -2        |
| 129 | N002 | C00P | C00X | H00X | 179.8     |
| 130 | N002 | C00P | C00X | C015 | -0.2(4)   |
| 131 | N004 | C00P | C00X | H00X | 0         |
| 132 | N004 | C00P | C00X | C015 | -180.0(3) |
| 133 | S001 | C00Q | C00S | C00L | 0.7(3)    |
| 134 | S001 | C00Q | C00S | H00S | -179.3    |
| 135 | C00V | C00Q | C00S | C00L | -174.2(3) |
| 136 | C00V | C00Q | C00S | H00S | 5.8       |
| 137 | S001 | C00Q | C00V | O003 | -2.6(4)   |
| 138 | S001 | C00Q | C00V | H00V | 177.4     |
| 139 | C00S | C00Q | C00V | O003 | 171.8(3)  |

|     |      |      |      |      |         |
|-----|------|------|------|------|---------|
| 140 | C00S | C00Q | C00V | H00V | -8.2    |
| 141 | C00I | C00R | C010 | C00Y | 0.4(4)  |
| 142 | C00I | C00R | C010 | H010 | -179.5  |
| 143 | H00R | C00R | C010 | C00Y | -179.6  |
| 144 | H00R | C00R | C010 | H010 | 0.4     |
| 145 | C008 | C00T | C00Y | H00Y | 179.3   |
| 146 | C008 | C00T | C00Y | C010 | -0.7(4) |
| 147 | H00T | C00T | C00Y | H00Y | -0.8    |
| 148 | H00T | C00T | C00Y | C010 | 179.2   |
| 149 | C00C | C00U | C00Z | C00O | 2.0(4)  |
| 150 | C00C | C00U | C00Z | H00Z | -178.1  |
| 151 | H00U | C00U | C00Z | C00O | -178    |
| 152 | H00U | C00U | C00Z | H00Z | 2       |
| 153 | C00A | C00W | C014 | C012 | -0.8(4) |
| 154 | C00A | C00W | C014 | H014 | 179.1   |
| 155 | H00W | C00W | C014 | C012 | 179.1   |
| 156 | H00W | C00W | C014 | H014 | -1      |
| 157 | C00P | C00X | C015 | H015 | -176.9  |
| 158 | C00P | C00X | C015 | C016 | 3.2(5)  |
| 159 | H00X | C00X | C015 | H015 | 3.1     |
| 160 | H00X | C00X | C015 | C016 | -176.8  |
| 161 | C00T | C00Y | C010 | C00R | 1.0(4)  |
| 162 | C00T | C00Y | C010 | H010 | -179    |
| 163 | H00Y | C00Y | C010 | C00R | -179    |
| 164 | H00Y | C00Y | C010 | H010 | 1       |
| 165 | C00M | C011 | C012 | H012 | -178.4  |
| 166 | C00M | C011 | C012 | C014 | 1.6(4)  |

|     |      |      |      |      |         |
|-----|------|------|------|------|---------|
| 167 | H011 | C011 | C012 | H012 | 1.7     |
| 168 | H011 | C011 | C012 | C014 | -178.3  |
| 169 | C011 | C012 | C014 | C00W | -0.7(4) |
| 170 | C011 | C012 | C014 | H014 | 179.4   |
| 171 | H012 | C012 | C014 | C00W | 179.3   |
| 172 | H012 | C012 | C014 | H014 | -0.7    |
| 173 | N002 | C013 | C016 | C015 | -0.8(5) |
| 174 | N002 | C013 | C016 | H016 | 179.1   |
| 175 | H013 | C013 | C016 | C015 | 179.2   |
| 176 | H013 | C013 | C016 | H016 | -1      |
| 177 | C00X | C015 | C016 | C013 | -2.8(5) |
| 178 | C00X | C015 | C016 | H016 | 177.4   |
| 179 | H015 | C015 | C016 | C013 | 177.3   |
| 180 | H015 | C015 | C016 | H016 | -2.5    |
